# Supplementary material
Source: PubMed Central journal article supplement (PMC8568646)
Supplement: NIHMS1731099-supplement-1.pdf [file NIHMS1731099-supplement-1.pdf]

# Machine Learning Takes a Village: Assessing neighbourhood-level vulnerability for an overdose and infectious disease outbreak

## Supplement

Jesse L. Yedinak, MPA<sup>1</sup>; Yu Li, MD, PhD, MPH<sup>1</sup>; Maxwell S. Krieger, BS<sup>1</sup>; Katharine Howe, MPH<sup>4</sup>; Hyunjoon Lee, BS<sup>1</sup>; Anna M. Civitarese, MPH<sup>4</sup>; Theodore Marak, MPH<sup>4</sup>; Elana Nelson<sup>1</sup>; Elizabeth A. Samuels, MD, MPH, MHS<sup>5, 6</sup>; Philip A. Chan, MD, MS<sup>2,3,4</sup>; Thomas Bertrand, MA, MPH<sup>4</sup>; Brandon D.L. Marshall, PhD<sup>1</sup>

1. Department of Epidemiology, Brown University School of Public Health, Providence, RI, USA
2. Department of Behavioral and Social Sciences, Brown University School of Public Health, Providence, RI, USA
3. Department of Medicine, Alpert Medical School of Brown University, Providence, RI, USA
4. Center for HIV, Hepatitis, STD, and TB Epidemiology, Rhode Island Department of Health, Providence, RI, USA
5. Department of Emergency Medicine, Alpert Medical School of Brown University, Providence, RI, USA
6. Overdose Prevention Program, Rhode Island Department of Health, Providence, RI, USA

## Table of contents

1. Data source descriptions
2. Dataset preparation
3. Supplemental File S2 Variable List

## Section 1: Data source descriptions

Public data sources:

### **2010 Decennial Census Datasets: Summary Files 1 & 2**

**Geography:** Census Tract

The Decennial Census and the American Community Survey (ACS) are part of the Decennial Census Program of the U.S. Census Bureau. Since 2005, in order to provide communities, businesses and the public with detailed information more frequently, data that were historically collected only once every 10 years by the decennial census long form have been collected monthly (and released annually) through the ACS.

More Information: <https://www.census.gov/programs-surveys/acs/data/summary-file.html>

### **2013-2017 American Community Survey 5-year Estimates**

**Geography:** Census Tract

The American Community Survey (ACS) is an ongoing survey that provides data every year -- giving communities the current information they need to plan investments and services. The ACS covers a broad range of topics about social, economic, demographic, and housing characteristics of the U.S. population. The 5-year estimates from the ACS are "period" estimates that represent data collected over a period of time. The primary advantage of using multiyear estimates is the increased statistical reliability of the data for less populated areas and small population subgroups. The 5-year estimates are available for all geographies down to the block group level. In total, there are 87 different summary levels available with over 578,000 geographic areas.

**More Information:** <https://www.census.gov/programs-surveys/acs/technical-documentation/table-and-geography-changes/2017/5-year.html>

### **Social Vulnerability Index (SVI)**

**Geography:** Census Tract

CDC's SVI uses U.S. Census data to determine the social vulnerability of every census tract. Census tracts are subdivisions of counties for which the Census collects statistical data. The SVI ranks each tract on 15 social factors, including poverty, lack of vehicle access, and crowded housing, and groups them into four related themes. Each tract receives a separate ranking for each of the four themes, as well as an overall ranking.

More Information: <https://svi.cdc.gov/data-and-tools-download.html>

### **RIGIS**

**Geography:** Point joined to Census Tract

The Rhode Island Geographic Information System (RIGIS) is a consortium promoting the interests of Rhode Island's geospatial community. This group of government and private organizations promotes the use of the latest technology as a means for managing and utilizing a comprehensive database of geographically-related (geospatial) information. The mission of RIGIS is to monitor, coordinate, and provide leadership for activities relating to the use of GIS technology within Rhode Island, to support initiatives that implement or use GIS technology, and to provide easy access to an extensive database of geospatial data for the state. By making this comprehensive collection of geospatial data widely available, RIGIS has become a leader in the United States as an open geospatial data clearinghouse. Through the promotion of a geographic information system (GIS), RIGIS is able to encourage individuals, private businesses, local and state government, K-12 institutions, and colleges and universities to invest in a staff with GIS expertise, the required technology (hardware and software) as a means for enhancing decision-making through the utilization of land-related information such as that provided by RIGIS. When used successfully, GIS can capture, store, manipulate, analyze, manage and present all spatially related data in a variety of ways for any number of disciplines.

**More information:** <http://info.rigis.org/>

Private Rhode Island data sources:

### **Office of the State Medical Examiner (OSME) database**

**Geography:** Point joined to Census Tract

The OSME database includes information collected during medical examiner investigations (including scene investigations, medical record review, and examinations) to determine the cause and manner of death for homicidal, suicidal, accidental (including trauma), sudden, and unexpected natural or undetermined deaths. OSME maintains comprehensive electronic and written records on all autopsies, including toxicology and pathology reports, death certificates, and case investigation summaries. (<https://link.springer.com/article/10.1007/s13181-015-0477-9>)

OSME's charts contained sociodemographic, incident, autopsy, toxicology, and third party reports of drug use for each decedent. OSME compiled this information from medical examiners' (MEs') reports, toxicology reports, emergency medical services and/or hospital reports, police reports, medical records, and other information provided to or requested by the ME to determine the cause of death. Rhode Island has a centralized ME system. All autopsy reports are reviewed by the Chief ME, who certifies the cause of death based on the advice provided by the lead ME for each case. (<https://doi.org/10.1093/pm/pnx015>)

### **Rhode Island Behavioral Health On-Line Data Service (BHOLD)**

**Geography:** Zip joined to Census Tract

All licensed behavioral healthcare organizations (BHOs) are required to submit all of their behavioral healthcare clients' admission, discharge and event data into the State's Behavioral Health On-Line Database (BHOLD). The data should include all elements listed in the BHOLD data dictionary and must be submitted at least monthly. A supplemental Excel file containing ICD-10 diagnosis codes must be sent at the same time as the BHOLD submission.

**More information:** <https://bhddh.ri.gov/sections/reporting.php>

## **Section 2: Dataset preparation**

Data from the OSME was first geocoded using exact locations corresponding to the address at which each overdose occurred using ArcGIS software (version 10.4). These address points were then joined to a Census Tract shapefile. Point information from RIGIS data sources was also joined to this shapefile. In Rhode Island, Census Tracts do not uniformly fit into their corresponding Zip Codes. Some Census Tracts may straddle two or more different Zip Codes. To join the BHOLD data to the Census Tract shapefile, a calculation was needed because the original data was at the Zip Code level. A Zip Code shapefile was overlaid on the Census Tract shapefile and a new shapefile was created, containing boundaries from both layers. The values for each Zip Code were then dispersed among intersecting Census Tracts using a percent area calculation. The new values were then aggregated back to the Census Tract layer.

Once all geoprocessing was complete, the resulting table was exported as a CSV. This file was then joined to the 2010 Census, 2013-2017 ACS, and 2016 SVI data using the Census Tract GEOID field. The resulting analytic table was then used to conduct all following analyses.

Supplemental File S2-VILLAGE Manuscript Table - v.2021.04.21

| Variable                    | Description                                                                  | Dataset    | Geographic Unit | Level of Access | Location                                                                                              | Min          | Mean         | Median       | Max          | StdDev      | Q1           | Q3           |
|-----------------------------|------------------------------------------------------------------------------|------------|-----------------|-----------------|-------------------------------------------------------------------------------------------------------|--------------|--------------|--------------|--------------|-------------|--------------|--------------|
| Black_Isolation             | Exposure Index for Black/African American                                    | Census     | Census          | Public          | <a href="https://www.census.gov/data/data-tools.html">https://www.census.gov/data/data-tools.html</a> | 0            | 1.13E-05     | 0.000006895  | 0.0000785    | 1.30E-05    | 0.00000245   | 0.00001625   |
| Black_Segregation           | Index of Dissimilarity for Black/African American                            | Census     | Census          | Public          | <a href="https://www.census.gov/data/data-tools.html">https://www.census.gov/data/data-tools.html</a> | 0.000122767  | 0.005199098  | 0.004206955  | 0.028016188  | 0.004336989 | 0.002441352  | 0.006269913  |
| Bup_Loc                     | Number of buprenorphine providers                                            | SAMHSA     | Point           | Public          | <a href="https://findtreatment.samhsa.gov/locator">https://findtreatment.samhsa.gov/locator</a>       | 0            | 0.341666667  | 0            | 4            | 0.726035066 | 0            | 0            |
| Census_area                 | -                                                                            | Census     | Census          | Public          | <a href="https://www.census.gov/data/data-tools.html">https://www.census.gov/data/data-tools.html</a> | 0.120963252  | 4.845267327  | 1.405734044  | 58.41397323  | 9.036501075 | 0.545782475  | 3.983985483  |
| Coordinate_X_centroid       | -                                                                            | Calculated | Census          | Public          | -                                                                                                     | 41.1761953   | 41.75224417  | 41.78993454  | 42.01404175  | 0.161962852 | 41.67967812  | 41.86397129  |
| Coordinate_Y_centroid       | -                                                                            | Calculated | Census          | Public          | -                                                                                                     | -71.82601407 | -71.44489784 | -71.43380211 | -71.16294006 | 0.115566398 | -71.49607684 | -71.38470847 |
| Deaths_2014                 | Number of overdose deaths in 2014                                            | OSME       | Point           | Private         | -                                                                                                     | 0            | 0.970833333  | 1            | 6            | 1.151306032 | 0            | 2            |
| Deaths_2015                 | Number of overdose deaths in 2015                                            | OSME       | Point           | Private         | -                                                                                                     | 0            | 1.166666667  | 1            | 6            | 1.256503306 | 0            | 2            |
| Deaths_2016                 | Number of overdose deaths in 2016                                            | OSME       | Point           | Private         | -                                                                                                     | 0            | 1.341666667  | 1            | 9            | 1.483498259 | 0            | 2            |
| Deaths_2017                 | Number of overdose deaths in 2017                                            | OSME       | Point           | Private         | -                                                                                                     | 0            | 1.154166667  | 1            | 7            | 1.311831951 | 0            | 2            |
| Deaths2014to2016            | Total number of overdose deaths between 2014 and 2016                        | OSME       | Point           | Private         | -                                                                                                     | 0            | 6.791666667  | 4            | 56           | 7.722049973 | 2            | 8            |
| F1                          | -                                                                            | -          | -               | -               | -                                                                                                     | 1            | 122          | 122.5        | 242          | 70.0715713  | 61.5         | 182.5        |
| FAC_EMScom                  | EMS Locations (personnel, equipment, ambulance services)                     | RIGIS      | Point           | Public          | <a href="http://www.rigis.org/">http://www.rigis.org/</a>                                             | 0            | 0.4625       | 0            | 3            | 0.71347608  | 0            | 1            |
| FAC_fire                    | Fire department facilities                                                   | RIGIS      | Point           | Public          | <a href="http://www.rigis.org/">http://www.rigis.org/</a>                                             | 0            | 0.666666667  | 1            | 4            | 0.790459147 | 0            | 1            |
| FAC_hosp                    | Hospital facilities                                                          | RIGIS      | Point           | Public          | <a href="http://www.rigis.org/">http://www.rigis.org/</a>                                             | 0            | 0.083333333  | 0            | 2            | 0.291679119 | 0            | 0            |
| FAC_law                     | Police stations, barracks, and sheriffs offices                              | RIGIS      | Point           | Public          | <a href="http://www.rigis.org/">http://www.rigis.org/</a>                                             | 0            | 0.283333333  | 0            | 3            | 0.520433249 | 0            | 1            |
| FAC_lib                     | Academic, private, public, and hospital library locations                    | RIGIS      | Point           | Public          | <a href="http://www.rigis.org/">http://www.rigis.org/</a>                                             | 0            | 0.470833333  | 0            | 5            | 0.753779413 | 0            | 1            |
| FAC_School                  | Public and private schools, preschool to university (2008)                   | RIGIS      | Point           | Public          | <a href="http://www.rigis.org/">http://www.rigis.org/</a>                                             | 0            | 2.820833333  | 2            | 11           | 2.038639132 | 1            | 4            |
| Fac_Scorp                   | Outdoor recreational facilities (playgrounds, ballfields, basketball courts) | RIGIS      | Point           | Public          | <a href="http://www.rigis.org/">http://www.rigis.org/</a>                                             | 0            | 4.033333333  | 3            | 18           | 3.410378777 | 2            | 5            |
| Geoid                       | -                                                                            | Census     | Census          | Public          | <a href="https://www.census.gov/data/data-tools.html">https://www.census.gov/data/data-tools.html</a> | 44001030100  | 44006162244  | 44007010751  | 44009051504  | 2073252.52  | 44005040750  | 44007015150  |
| Hispanic_Isolation          | Percentage of residents who are Hispanic/Latino                              | Census     | Census          | Public          | <a href="https://www.census.gov/data/data-tools.html">https://www.census.gov/data/data-tools.html</a> | 0            | 1.04E-05     | 0.000006405  | 0.0000806    | 1.16E-05    | 0.000003075  | 0.00001335   |
| Hispanic_Segregation        | Index of Dissimilarity for Hispanic/Latino                                   | Census     | Census          | Public          | <a href="https://www.census.gov/data/data-tools.html">https://www.census.gov/data/data-tools.html</a> | 0.00001      | 0.005327078  | 0.003778533  | 0.041637968  | 0.005714133 | 0.0021271    | 0.006137428  |
| Inj2014                     | Number of injection-related overdose deaths in 2014                          | CME        | Point           | Private         | -                                                                                                     | 0            | 0.366666667  | 0            | 3            | 0.652428144 | 0            | 1            |
| Inj2014to2016               | Number of injection-related overdose deaths from 2014 to 2016                | CME        | Point           | Private         | -                                                                                                     | 0            | 1.25         | 1            | 7            | 1.450724822 | 0            | 2            |
| Inj2015                     | Number of injection-related overdose deaths in 2015                          | CME        | Point           | Private         | -                                                                                                     | 0            | 0.391666667  | 0            | 4            | 0.700219133 | 0            | 1            |
| Inj2016                     | Number of injection-related overdose deaths in 2016                          | CME        | Point           | Private         | -                                                                                                     | 0            | 0.491666667  | 0            | 6            | 0.828325258 | 0            | 1            |
| Inj2017                     | Number of injection-related overdose deaths in 2017 (*2017 incomplete)       | CME        | Point           | Private         | -                                                                                                     | 0            | 0.2125       | 0            | 3            | 0.493313025 | 0            | 0            |
| Male_Female_Ratio           | Ratio of number of male residents to number of female residents              | Census     | Census          | Public          | <a href="https://www.census.gov/data/data-tools.html">https://www.census.gov/data/data-tools.html</a> | 0.618777147  | 0.962687142  | 0.944493391  | 2.980392157  | 0.205373932 | 0.874488101  | 1.005399429  |
| Median_Age                  | Median age (all residents)                                                   | Census     | Census          | Public          | <a href="https://www.census.gov/data/data-tools.html">https://www.census.gov/data/data-tools.html</a> | 19.5         | 40.45208333  | 42.25        | 62.3         | 7.97776695  | 34.3         | 46.5         |
| Median_earnings             | Median earnings among individuals aged 16 years and older                    | Census     | Census          | Public          | <a href="https://www.census.gov/data/data-tools.html">https://www.census.gov/data/data-tools.html</a> | 3297         | 34490.60833  | 35759.5      | 77700        | 10956.97739 | 28256.5      | 40947        |
| Median_Female_Age           | Median age (Female residents)                                                | Census     | Census          | Public          | <a href="https://www.census.gov/data/data-tools.html">https://www.census.gov/data/data-tools.html</a> | 19.5         | 41.81958333  | 43.8         | 63           | 8.579058369 | 35.1         | 48.1         |
| Median_income               | Median household income                                                      | Census     | Census          | Public          | <a href="https://www.census.gov/data/data-tools.html">https://www.census.gov/data/data-tools.html</a> | 13359        | 60746.09583  | 58799.5      | 176000       | 24201.49081 | 42788        | 74758.5      |
| Median_Male_Age             | Median age (Male residents)                                                  | Census     | Census          | Public          | <a href="https://www.census.gov/data/data-tools.html">https://www.census.gov/data/data-tools.html</a> | 19.5         | 39.06625     | 40.4         | 59.7         | 7.793607676 | 33.6         | 44.75        |
| Median_rent_percent_income  | Median rent (as a percentage of income)                                      | Census     | Census          | Public          | <a href="https://www.census.gov/data/data-tools.html">https://www.census.gov/data/data-tools.html</a> | 40           | 689.55       | 644.5        | 1771         | 427.5228903 | 356.5        | 949          |
| Median_year_structure_built | Median year structures in census block group were built                      | Census     | Census          | Public          | <a href="https://www.census.gov/data/data-tools.html">https://www.census.gov/data/data-tools.html</a> | 1939         | 1957.55      | 1956.5       | 1992         | 14.99084798 | 1939.5       | 1970         |
| Meth_Loc                    | Number of methadone providers                                                | SAMHSA     | Point           | Public          | <a href="https://findtreatment.samhsa.gov/locator">https://findtreatment.samhsa.gov/locator</a>       | 0            | 0.0875       | 0            | 2            | 0.324472536 | 0            | 0            |
| Number_of_Records           | -                                                                            | Calculated | -               | Public          | -                                                                                                     | 1            | 1            | 1            | 1            | 0           | 1            | 1            |
| Percent_00_04               | Percentage of all residents who are 4 years old or younger                   | Census     | Census          | Public          | <a href="https://www.census.gov/data/data-tools.html">https://www.census.gov/data/data-tools.html</a> | 0.001599147  | 0.051926846  | 0.049734586  | 0.138050832  | 0.023745839 | 0.032448344  | 0.067004082  |
| Percent_05_14               | Percentage of all residents who are between 5 and 14 years old               | Census     | Census          | Public          | <a href="https://www.census.gov/data/data-tools.html">https://www.census.gov/data/data-tools.html</a> | 0.000710732  | 0.111272179  | 0.107804228  | 0.222077922  | 0.037971108 | 0.089575065  | 0.134164605  |
| Percent_15_24               | Percentage of all residents who are between 15 and 24 years old              | Census     | Census          | Public          | <a href="https://www.census.gov/data/data-tools.html">https://www.census.gov/data/data-tools.html</a> | 0.056771141  | 0.161588487  | 0.139753282  | 0.953091684  | 0.100652445 | 0.114421912  | 0.169203099  |
| Percent_25_44               | Percentage of all residents who are between 24 and 44 years old              | Census     | Census          | Public          | <a href="https://www.census.gov/data/data-tools.html">https://www.census.gov/data/data-tools.html</a> | 0.011904762  | 0.253561639  | 0.25352929   | 0.477339901  | 0.066697902 | 0.211050144  | 0.292078248  |
| Percent_45_64               | Percentage of all residents who are between 45 and 64 years old              | Census     | Census          | Public          | <a href="https://www.census.gov/data/data-tools.html">https://www.census.gov/data/data-tools.html</a> | 0.014925373  | 0.279426249  | 0.292497005  | 0.499435028  | 0.065052568 | 0.24091375   | 0.323689646  |

Supplemental File S2-VILLAGE Manuscript Table - v.2021.04.21

| Variable                           | Description                                                                                           | Dataset | Geographic Unit | Level of Access | Location                                                                                              | Min         | Mean         | Median      | Max         | StdDev      | Q1          | Q3          |
|------------------------------------|-------------------------------------------------------------------------------------------------------|---------|-----------------|-----------------|-------------------------------------------------------------------------------------------------------|-------------|--------------|-------------|-------------|-------------|-------------|-------------|
| Percent_65                         | Percentage of all residents who are 65 years old or older                                             | Census  | Census          | Public          | <a href="https://www.census.gov/data/data-tools.html">https://www.census.gov/data/data-tools.html</a> | 0.008173419 | 0.1599048756 | 0.159909742 | 0.422634271 | 0.063210144 | 0.113826747 | 0.199757459 |
| Percent_9th_12th_grade             | Percentage of residents age 25 years and older whose highest education level is 9th to 12th grade     | Census  | Census          | Public          | <a href="https://www.census.gov/data/data-tools.html">https://www.census.gov/data/data-tools.html</a> | 0.002430134 | 0.074428193  | 0.061414347 | 0.215723509 | 0.047433293 | 0.0393128   | 0.099612839 |
| Percent_Associates_Degree          | Percentage of residents age 25 years and older whose highest education level is an associate's degree | Census  | Census          | Public          | <a href="https://www.census.gov/data/data-tools.html">https://www.census.gov/data/data-tools.html</a> | 0.004860267 | 0.082363989  | 0.082718464 | 0.164346561 | 0.030933931 | 0.059817464 | 0.106209839 |
| Percent_Bachelors_Degree           | Percentage of residents age 25 years and older whose highest education level is a bachelor's degree   | Census  | Census          | Public          | <a href="https://www.census.gov/data/data-tools.html">https://www.census.gov/data/data-tools.html</a> | 0.03565365  | 0.193745669  | 0.190876623 | 0.461199295 | 0.083657721 | 0.133784513 | 0.252900619 |
| Percent_Bachelors_or_higher        | Percentage of residents age 25 years and older who completed at least a bachelor's degree             | Census  | Census          | Public          | <a href="https://www.census.gov/data/data-tools.html">https://www.census.gov/data/data-tools.html</a> | 0.052429221 | 0.327340572  | 0.298828132 | 0.91122449  | 0.175182527 | 0.194924342 | 0.445562785 |
| Percent_Black_NH                   | Percentage of residents who are Black/African American (non-Hispanic/Latino)                          | Census  | Census          | Public          | <a href="https://www.census.gov/data/data-tools.html">https://www.census.gov/data/data-tools.html</a> | 0           | 0.05769321   | 0.024671398 | 0.372815534 | 0.07306915  | 0.006290996 | 0.091464086 |
| Percent_child_families_1_worker    | Percentages of families with children with 1 worker                                                   | Census  | Census          | Public          | <a href="https://www.census.gov/data/data-tools.html">https://www.census.gov/data/data-tools.html</a> | 0           | 0.390884417  | 0.380054785 | 0.851351351 | 0.149162797 | 0.273460411 | 0.498583333 |
| Percent_child_families_2_workers   | Percentages of families with children with 2 or more workers                                          | Census  | Census          | Public          | <a href="https://www.census.gov/data/data-tools.html">https://www.census.gov/data/data-tools.html</a> | 0.054054054 | 0.815912893  | 0.85019521  | 1.645021645 | 0.304334781 | 0.598029167 | 1.047749511 |
| Percent_child_families_no_worker   | Percentages of families with children with no workers                                                 | Census  | Census          | Public          | <a href="https://www.census.gov/data/data-tools.html">https://www.census.gov/data/data-tools.html</a> | 0           | 0.063758636  | 0.037716421 | 0.569620253 | 0.078803981 | 0           | 0.105960438 |
| Percent_construction_occupations   | Percentage of employed individuals in natural resources, construction, and maintenance occupations    | Census  | Census          | Public          | <a href="https://www.census.gov/data/data-tools.html">https://www.census.gov/data/data-tools.html</a> | 0           | 0.073972324  | 0.074846493 | 0.226937269 | 0.035243351 | 0.047655927 | 0.096737936 |
| Percent_crowded_housing            | Percentage of housing units with 1 or more occupant per room                                          | Census  | Census          | Public          | <a href="https://www.census.gov/data/data-tools.html">https://www.census.gov/data/data-tools.html</a> | 0           | 0.017160525  | 0.009276452 | 0.094806763 | 0.0203671   | 0           | 0.026887308 |
| Percent_divorced                   | Percentage of residents age 15 years and older who are divorced                                       | Census  | Census          | Public          | <a href="https://www.census.gov/data/data-tools.html">https://www.census.gov/data/data-tools.html</a> | 0.006411398 | 0.116071626  | 0.111519745 | 0.23551058  | 0.039723214 | 0.093371792 | 0.136160648 |
| Percent_earnings_10000_14999       | Percentage of individuals aged 16 years and older who earned between \$10,000 and \$14,999            | Census  | Census          | Public          | <a href="https://www.census.gov/data/data-tools.html">https://www.census.gov/data/data-tools.html</a> | 0.012596899 | 0.076050707  | 0.069310768 | 0.229050279 | 0.035106144 | 0.052899918 | 0.092651131 |
| Percent_earnings_100000_over       | Percentage of individuals aged 16 years and older who earned greater than \$100,000                   | Census  | Census          | Public          | <a href="https://www.census.gov/data/data-tools.html">https://www.census.gov/data/data-tools.html</a> | 0           | 0.081089165  | 0.069330373 | 0.419089147 | 0.068541296 | 0.029748063 | 0.113689359 |
| Percent_earnings_15000_24999       | Percentage of individuals aged 16 years and older who earned between \$15,000 and \$24,999            | Census  | Census          | Public          | <a href="https://www.census.gov/data/data-tools.html">https://www.census.gov/data/data-tools.html</a> | 0.021194605 | 0.134025357  | 0.124611523 | 0.352372583 | 0.0563781   | 0.097901315 | 0.157714333 |
| Percent_earnings_25000_34999       | Percentage of individuals aged 16 years and older who earned between \$25,000 and \$34,999            | Census  | Census          | Public          | <a href="https://www.census.gov/data/data-tools.html">https://www.census.gov/data/data-tools.html</a> | 0.010276172 | 0.130254759  | 0.126589993 | 0.24413725  | 0.045895603 | 0.095039725 | 0.158057488 |
| Percent_earnings_35000_49999       | Percentage of individuals aged 16 years and older who earned between \$35,000 and \$49,999            | Census  | Census          | Public          | <a href="https://www.census.gov/data/data-tools.html">https://www.census.gov/data/data-tools.html</a> | 0.001712695 | 0.155744017  | 0.153499012 | 0.298726738 | 0.047387215 | 0.120655629 | 0.188796083 |
| Percent_earnings_50000_64999       | Percentage of individuals aged 16 years and older who earned between \$50,000 and \$64,999            | Census  | Census          | Public          | <a href="https://www.census.gov/data/data-tools.html">https://www.census.gov/data/data-tools.html</a> | 0.002569043 | 0.115388764  | 0.117523876 | 0.224782609 | 0.042194183 | 0.085006866 | 0.145624991 |
| Percent_earnings_65000_74999       | Percentage of individuals aged 16 years and older who earned between \$65,000 and \$74,999            | Census  | Census          | Public          | <a href="https://www.census.gov/data/data-tools.html">https://www.census.gov/data/data-tools.html</a> | 0           | 0.050496063  | 0.049844721 | 0.158930561 | 0.028433957 | 0.029063419 | 0.066941218 |
| Percent_earnings_75000_99999       | Percentage of individuals aged 16 years and older who earned between \$75,000 and \$99,999            | Census  | Census          | Public          | <a href="https://www.census.gov/data/data-tools.html">https://www.census.gov/data/data-tools.html</a> | 0           | 0.075356393  | 0.073744633 | 0.179950327 | 0.040193409 | 0.045341266 | 0.103868798 |
| Percent_earnings_under_10000       | Percentage of individuals aged 16 years and older who earned under \$10,000                           | Census  | Census          | Public          | <a href="https://www.census.gov/data/data-tools.html">https://www.census.gov/data/data-tools.html</a> | 0.0529462   | 0.181594775  | 0.157673775 | 0.906229929 | 0.103854567 | 0.129547536 | 0.197143982 |
| Percent_families_married_couples   | Percentage of households with married couples                                                         | Census  | Census          | Public          | <a href="https://www.census.gov/data/data-tools.html">https://www.census.gov/data/data-tools.html</a> | 0.237394958 | 0.691799113  | 0.720145835 | 1           | 0.154560634 | 0.591494409 | 0.806486057 |
| Percent_families_poverty           | Percentage of families with income below the federal poverty line                                     | Census  | Census          | Public          | <a href="https://www.census.gov/data/data-tools.html">https://www.census.gov/data/data-tools.html</a> | 0.007936508 | 0.147644938  | 0.112018875 | 0.52327044  | 0.110868206 | 0.064020037 | 0.199331282 |
| Percent_Female                     | Percentage of residents who are female                                                                | Census  | Census          | Public          | <a href="https://www.census.gov/data/data-tools.html">https://www.census.gov/data/data-tools.html</a> | 0.251231527 | 0.513251245  | 0.514272788 | 0.617750258 | 0.037912163 | 0.498653782 | 0.533478982 |
| Percent_Female_00_04               | Percentage of female residents who are 4 years old or younger                                         | Census  | Census          | Public          | <a href="https://www.census.gov/data/data-tools.html">https://www.census.gov/data/data-tools.html</a> | 0           | 0.04954242   | 0.044726708 | 0.162745098 | 0.028419371 | 0.029745212 | 0.065191657 |
| Percent_Female_05_14               | Percentage of female residents who are between 5 and 14 years old                                     | Census  | Census          | Public          | <a href="https://www.census.gov/data/data-tools.html">https://www.census.gov/data/data-tools.html</a> | 0           | 0.105071777  | 0.101165346 | 0.228938601 | 0.040892487 | 0.078282359 | 0.130846831 |
| Percent_Female_15_24               | Percentage of female residents who are between 15 and 24 years old                                    | Census  | Census          | Public          | <a href="https://www.census.gov/data/data-tools.html">https://www.census.gov/data/data-tools.html</a> | 0.05856833  | 0.172714035  | 0.151976588 | 0.952365729 | 0.104536312 | 0.124155173 | 0.187019394 |
| Percent_Female_25_44               | Percentage of female residents who are between 24 and 44 years old                                    | Census  | Census          | Public          | <a href="https://www.census.gov/data/data-tools.html">https://www.census.gov/data/data-tools.html</a> | 0.007352941 | 0.247825236  | 0.246051733 | 0.425322214 | 0.066464945 | 0.203278744 | 0.291202949 |
| Percent_Female_45_64               | Percentage of female residents who are between 45 and 64 years old                                    | Census  | Census          | Public          | <a href="https://www.census.gov/data/data-tools.html">https://www.census.gov/data/data-tools.html</a> | 0.015345269 | 0.281176589  | 0.294465225 | 0.441613588 | 0.068139303 | 0.239239576 | 0.327689835 |
| Percent_Female_65                  | Percentage of female residents who are 65 years old or older                                          | Census  | Census          | Public          | <a href="https://www.census.gov/data/data-tools.html">https://www.census.gov/data/data-tools.html</a> | 0.007672634 | 0.177625483  | 0.179560747 | 0.436964504 | 0.072993361 | 0.123589494 | 0.219200074 |
| Percent_female_9th_12th_grade      | Percentage of females age 25 years and older whose highest education level is 9th to 12th grade       | Census  | Census          | Public          | <a href="https://www.census.gov/data/data-tools.html">https://www.census.gov/data/data-tools.html</a> | 0           | 0.070103221  | 0.057074454 | 0.277661795 | 0.050437216 | 0.033432978 | 0.098145552 |
| Percent_female_Associates_Degree   | Percentage of females age 25 years and older whose highest education level is an associate's degree   | Census  | Census          | Public          | <a href="https://www.census.gov/data/data-tools.html">https://www.census.gov/data/data-tools.html</a> | 0           | 0.090132208  | 0.088805432 | 0.199625702 | 0.03967854  | 0.061995753 | 0.115996783 |
| Percent_female_Bachelors_Degree    | Percentage of females age 25 years and older whose highest education level is a bachelor's degree     | Census  | Census          | Public          | <a href="https://www.census.gov/data/data-tools.html">https://www.census.gov/data/data-tools.html</a> | 0.030326594 | 0.191078934  | 0.188975037 | 0.446194226 | 0.086701965 | 0.122337747 | 0.255500732 |
| Percent_female_Bachelors_or_higher | Percentage of females age 25 years and older who completed at least a bachelor's degree               | Census  | Census          | Public          | <a href="https://www.census.gov/data/data-tools.html">https://www.census.gov/data/data-tools.html</a> | 0.031421838 | 0.324946896  | 0.300742659 | 0.919565217 | 0.171931262 | 0.200071177 | 0.450320312 |

Supplemental File S2-VILLAGE Manuscript Table - v.2021.04.21

| Variable                                 | Description                                                                                           | Dataset | Geographic Unit | Level of Access | Location                                                                                              | Min         | Mean        | Median      | Max         | StdDev      | Q1          | Q3          |
|------------------------------------------|-------------------------------------------------------------------------------------------------------|---------|-----------------|-----------------|-------------------------------------------------------------------------------------------------------|-------------|-------------|-------------|-------------|-------------|-------------|-------------|
| Percent_female_construction_occupa       | Percentage of employed females in natural resources, construction, and maintenance occupations        | Census  | Census          | Public          | <a href="https://www.census.gov/data/data-tools.html">https://www.census.gov/data/data-tools.html</a> | 0           | 0.004505804 | 0           | 0.06295754  | 0.009708082 | 0           | 0.006226109 |
| Percent_female_divorced                  | Percentage of female residents age 15 years and older who are divorced                                | Census  | Census          | Public          | <a href="https://www.census.gov/data/data-tools.html">https://www.census.gov/data/data-tools.html</a> | 0.007275667 | 0.130244439 | 0.126000324 | 0.294885362 | 0.046410303 | 0.099620163 | 0.156678077 |
| Percent_female_earnings_10000_14         | Percentage of females aged 16 years and older who earned between \$10,000 and \$14,999                | Census  | Census          | Public          | <a href="https://www.census.gov/data/data-tools.html">https://www.census.gov/data/data-tools.html</a> | 0.017410229 | 0.091503459 | 0.082887745 | 0.320399113 | 0.051668342 | 0.055815161 | 0.112654704 |
| Percent_female_earnings_100000_0         | Percentage of females aged 16 years and older who earned greater than \$100,000                       | Census  | Census          | Public          | <a href="https://www.census.gov/data/data-tools.html">https://www.census.gov/data/data-tools.html</a> | 0           | 0.046875606 | 0.034955713 | 0.282916213 | 0.04780438  | 0.009667413 | 0.070330403 |
| Percent_female_earnings_15000_24         | Percentage of females aged 16 years and older who earned between \$15,000 and \$24,999                | Census  | Census          | Public          | <a href="https://www.census.gov/data/data-tools.html">https://www.census.gov/data/data-tools.html</a> | 0.016346837 | 0.149876423 | 0.140915369 | 0.384259259 | 0.067699369 | 0.102595319 | 0.193276751 |
| Percent_female_earnings_25000_34         | Percentage of females aged 16 years and older who earned between \$25,000 and \$34,999                | Census  | Census          | Public          | <a href="https://www.census.gov/data/data-tools.html">https://www.census.gov/data/data-tools.html</a> | 0.010691376 | 0.140679532 | 0.138837128 | 0.288494078 | 0.055968167 | 0.102617259 | 0.173787931 |
| Percent_female_earnings_35000_49         | Percentage of females aged 16 years and older who earned between \$35,000 and \$49,999                | Census  | Census          | Public          | <a href="https://www.census.gov/data/data-tools.html">https://www.census.gov/data/data-tools.html</a> | 0.003138486 | 0.152528795 | 0.15093764  | 0.320163488 | 0.057632634 | 0.110571494 | 0.191581633 |
| Percent_female_earnings_50000_64         | Percentage of females aged 16 years and older who earned between \$50,000 and \$64,999                | Census  | Census          | Public          | <a href="https://www.census.gov/data/data-tools.html">https://www.census.gov/data/data-tools.html</a> | 0           | 0.100925367 | 0.10040872  | 0.255376344 | 0.050508139 | 0.066921158 | 0.135771301 |
| Percent_female_earnings_65000_74         | Percentage of females aged 16 years and older who earned between \$65,000 and \$74,999                | Census  | Census          | Public          | <a href="https://www.census.gov/data/data-tools.html">https://www.census.gov/data/data-tools.html</a> | 0           | 0.044756663 | 0.040921202 | 0.168373151 | 0.031860703 | 0.021890984 | 0.06321055  |
| Percent_female_earnings_75000_99         | Percentage of females aged 16 years and older who earned between \$75,000 and \$99,999                | Census  | Census          | Public          | <a href="https://www.census.gov/data/data-tools.html">https://www.census.gov/data/data-tools.html</a> | 0           | 0.065239083 | 0.062354109 | 0.248043818 | 0.041782897 | 0.031975377 | 0.092514784 |
| Percent_female_earnings_under_10         | Percentage of females aged 16 years and older who earned under \$10,000                               | Census  | Census          | Public          | <a href="https://www.census.gov/data/data-tools.html">https://www.census.gov/data/data-tools.html</a> | 0.06512301  | 0.207615072 | 0.184267525 | 0.914476265 | 0.113795176 | 0.149315798 | 0.229947656 |
| Percent_female_Graduate_Degree           | Percentage of females age 25 years and older whose highest education level is a graduate degree       | Census  | Census          | Public          | <a href="https://www.census.gov/data/data-tools.html">https://www.census.gov/data/data-tools.html</a> | 0           | 0.133867962 | 0.114611005 | 0.72173913  | 0.10088365  | 0.063199859 | 0.188528738 |
| Percent_female_Graduate_or_higher        | Percentage of females age 25 years and older who completed at least a graduate degree                 | Census  | Census          | Public          | <a href="https://www.census.gov/data/data-tools.html">https://www.census.gov/data/data-tools.html</a> | 0           | 0.133867962 | 0.114611005 | 0.72173913  | 0.10088365  | 0.063199859 | 0.188528738 |
| Percent_female_High_School               | Percentage of females age 25 years and older whose highest education level is a high school diploma   | Census  | Census          | Public          | <a href="https://www.census.gov/data/data-tools.html">https://www.census.gov/data/data-tools.html</a> | 0.023622047 | 0.264411999 | 0.262759986 | 0.503910615 | 0.082462344 | 0.217333583 | 0.322582493 |
| Percent_female_High_school_or_higher     | Percentage of females age 25 years and older who completed at least high school                       | Census  | Census          | Public          | <a href="https://www.census.gov/data/data-tools.html">https://www.census.gov/data/data-tools.html</a> | 0.509819324 | 0.869348373 | 0.905044683 | 1           | 0.103404086 | 0.827797581 | 0.942669734 |
| Percent_female_householder               | Percentage of households with female householder (no spouse present)                                  | Census  | Census          | Public          | <a href="https://www.census.gov/data/data-tools.html">https://www.census.gov/data/data-tools.html</a> | 0           | 0.229648572 | 0.204878164 | 0.648275862 | 0.126118271 | 0.136233316 | 0.300420371 |
| Percent_female_householder_with_children | Percentage of households with female householder (no spouse present) with children                    | Census  | Census          | Public          | <a href="https://www.census.gov/data/data-tools.html">https://www.census.gov/data/data-tools.html</a> | 0           | 0.127333685 | 0.094654617 | 0.391389432 | 0.09617809  | 0.058336931 | 0.182728472 |
| Percent_female_Less_9th                  | Percentage of females age 25 years and older whose highest education level is less than 9th grade     | Census  | Census          | Public          | <a href="https://www.census.gov/data/data-tools.html">https://www.census.gov/data/data-tools.html</a> | 0           | 0.060548407 | 0.03494337  | 0.317297099 | 0.066618787 | 0.015543727 | 0.076900702 |
| Percent_female_less_than_HS              | Percentage of females age 25 years and older who did not complete high school                         | Census  | Census          | Public          | <a href="https://www.census.gov/data/data-tools.html">https://www.census.gov/data/data-tools.html</a> | 0           | 0.130651627 | 0.094955317 | 0.490180676 | 0.103404086 | 0.057330267 | 0.17220242  |
| Percent_female_management_occupa         | Percentage of employed females in management, business, science, and arts occupations                 | Census  | Census          | Public          | <a href="https://www.census.gov/data/data-tools.html">https://www.census.gov/data/data-tools.html</a> | 0.035755479 | 0.406848972 | 0.414022702 | 0.906896552 | 0.147832943 | 0.300193561 | 0.505180283 |
| Percent_female_never_married             | Percentage of female residents age 15 years and older who were never married                          | Census  | Census          | Public          | <a href="https://www.census.gov/data/data-tools.html">https://www.census.gov/data/data-tools.html</a> | 0.122265122 | 0.332486634 | 0.298024195 | 0.973785166 | 0.136243438 | 0.238183831 | 0.41206238  |
| Percent_female_now_married               | Percentage of female residents age 15 years and older who are now married                             | Census  | Census          | Public          | <a href="https://www.census.gov/data/data-tools.html">https://www.census.gov/data/data-tools.html</a> | 0.016943734 | 0.440415218 | 0.440401903 | 0.726978998 | 0.120548118 | 0.364862058 | 0.518223627 |
| Percent_female_production_occupa         | Percentage of employed females in production, transportation, and material moving occupations         | Census  | Census          | Public          | <a href="https://www.census.gov/data/data-tools.html">https://www.census.gov/data/data-tools.html</a> | 0           | 0.061274792 | 0.043672682 | 0.32879046  | 0.05751966  | 0.019135268 | 0.085506871 |
| Percent_female_sales_occupations         | Percentage of employed females in sales and office occupations                                        | Census  | Census          | Public          | <a href="https://www.census.gov/data/data-tools.html">https://www.census.gov/data/data-tools.html</a> | 0.061206897 | 0.300094501 | 0.302721952 | 0.533613445 | 0.079355425 | 0.250572086 | 0.350088563 |
| Percent_female_service_occupati          | Percentage of employed females in service occupations                                                 | Census  | Census          | Public          | <a href="https://www.census.gov/data/data-tools.html">https://www.census.gov/data/data-tools.html</a> | 0.025454545 | 0.227275931 | 0.209006277 | 0.535135135 | 0.100053275 | 0.154778894 | 0.284608565 |
| Percent_female_Some_College              | Percentage of females age 25 years and older whose highest education level is some college            | Census  | Census          | Public          | <a href="https://www.census.gov/data/data-tools.html">https://www.census.gov/data/data-tools.html</a> | 0           | 0.189857269 | 0.191011939 | 0.395424837 | 0.06026255  | 0.156648788 | 0.222401274 |
| Percent_female_Some_college_or_higher    | Percentage of females age 25 years and older who completed at least some college                      | Census  | Census          | Public          | <a href="https://www.census.gov/data/data-tools.html">https://www.census.gov/data/data-tools.html</a> | 0.188531029 | 0.604936373 | 0.620160405 | 0.976377953 | 0.149572897 | 0.507016005 | 0.706584777 |
| Percent_female_widowed                   | Percentage of female residents age 15 years and older who are widowed                                 | Census  | Census          | Public          | <a href="https://www.census.gov/data/data-tools.html">https://www.census.gov/data/data-tools.html</a> | 0           | 0.096853708 | 0.090527334 | 0.235644637 | 0.042558314 | 0.068045306 | 0.121553196 |
| Percent_full_time                        | Percentage of individuals aged 16 years or older employed full-time                                   | Census  | Census          | Public          | <a href="https://www.census.gov/data/data-tools.html">https://www.census.gov/data/data-tools.html</a> | 0.0349065   | 0.40107327  | 0.411192566 | 0.592163355 | 0.073666147 | 0.372619533 | 0.445919403 |
| Percent_Graduate_Degree                  | Percentage of residents age 25 years and older whose highest education level is a graduate degree     | Census  | Census          | Public          | <a href="https://www.census.gov/data/data-tools.html">https://www.census.gov/data/data-tools.html</a> | 0.00384481  | 0.133594903 | 0.110330714 | 0.717346939 | 0.10559053  | 0.056629541 | 0.186042318 |
| Percent_Graduate_or_higher               | Percentage of residents age 25 years and older who completed at least a graduate degree               | Census  | Census          | Public          | <a href="https://www.census.gov/data/data-tools.html">https://www.census.gov/data/data-tools.html</a> | 0.491087033 | 0.865680331 | 0.899938831 | 0.989503608 | 0.101330594 | 0.823191768 | 0.935206704 |
| Percent_High_School                      | Percentage of residents age 25 years and older whose highest education level is a high school diploma | Census  | Census          | Public          | <a href="https://www.census.gov/data/data-tools.html">https://www.census.gov/data/data-tools.html</a> | 0.019441069 | 0.273090092 | 0.285153924 | 0.479057592 | 0.083166755 | 0.218275322 | 0.327541389 |
| Percent_High_school_or_higher            | Percentage of residents age 25 years and older who completed at least high school                     | Census  | Census          | Public          | <a href="https://www.census.gov/data/data-tools.html">https://www.census.gov/data/data-tools.html</a> | 0.491087033 | 0.865680331 | 0.899938831 | 0.989503608 | 0.101330594 | 0.823191768 | 0.935206704 |
| Percent_Hispanic                         | Percentage of residents who are Hispanic/Latino                                                       | Census  | Census          | Public          | <a href="https://www.census.gov/data/data-tools.html">https://www.census.gov/data/data-tools.html</a> | 0           | 0.137598319 | 0.0560817   | 0.743838337 | 0.179325136 | 0.025748209 | 0.153626039 |

Supplemental File S2-VILLAGE Manuscript Table - v.2021.04.21

| Variable                          | Description                                                                                         | Dataset | Geographic Unit | Level of Access | Location                                                                                              | Min         | Mean        | Median      | Max         | StdDev      | Q1          | Q3          |
|-----------------------------------|-----------------------------------------------------------------------------------------------------|---------|-----------------|-----------------|-------------------------------------------------------------------------------------------------------|-------------|-------------|-------------|-------------|-------------|-------------|-------------|
| Percent_householder_living_alone  | Percentage of households receiving food stamps                                                      | Census  | Census          | Public          | <a href="https://www.census.gov/data/data-tools.html">https://www.census.gov/data/data-tools.html</a> | 0.103703704 | 0.305116071 | 0.299678707 | 0.71741573  | 0.099811161 | 0.236731841 | 0.354804592 |
| Percent_households_food_stamps    | Percentage of households consisting of a single member living alone                                 | Census  | Census          | Public          | <a href="https://www.census.gov/data/data-tools.html">https://www.census.gov/data/data-tools.html</a> | 0           | 0.167017238 | 0.120718089 | 0.615303983 | 0.142342071 | 0.061480222 | 0.230966052 |
| Percent_households_poverty        | Percentage of households with income below the federal poverty line                                 | Census  | Census          | Public          | <a href="https://www.census.gov/data/data-tools.html">https://www.census.gov/data/data-tools.html</a> | 0           | 0.107620511 | 0.065384168 | 0.433895297 | 0.106411336 | 0.029079907 | 0.155447965 |
| Percent_households_with_over_64   | Percentage of households with at least one member over 64 years old                                 | Census  | Census          | Public          | <a href="https://www.census.gov/data/data-tools.html">https://www.census.gov/data/data-tools.html</a> | 0.055333333 | 0.281571867 | 0.284008993 | 0.567320261 | 0.086136632 | 0.228845798 | 0.337026177 |
| Percent_households_with_under_18  | Percentage of households with at least one member under 18 years old                                | Census  | Census          | Public          | <a href="https://www.census.gov/data/data-tools.html">https://www.census.gov/data/data-tools.html</a> | 0.026732673 | 0.290502095 | 0.287770746 | 0.551341351 | 0.098593961 | 0.22847395  | 0.347000621 |
| Percent_income_10000_14999        | Percentage of households with income between \$10,000 and \$14,999                                  | Census  | Census          | Public          | <a href="https://www.census.gov/data/data-tools.html">https://www.census.gov/data/data-tools.html</a> | 0           | 0.056898977 | 0.049176153 | 0.247169811 | 0.041150537 | 0.025979604 | 0.077802342 |
| Percent_income_100000_over        | Percentage of households with income greater than \$100,000                                         | Census  | Census          | Public          | <a href="https://www.census.gov/data/data-tools.html">https://www.census.gov/data/data-tools.html</a> | 0.017621145 | 0.260944137 | 0.246155635 | 0.810966811 | 0.15857801  | 0.130786466 | 0.354262335 |
| Percent_income_15000_24999        | Percentage of households with income between \$15,000 and \$24,999                                  | Census  | Census          | Public          | <a href="https://www.census.gov/data/data-tools.html">https://www.census.gov/data/data-tools.html</a> | 0.003209537 | 0.096870285 | 0.092384458 | 0.263113367 | 0.046166933 | 0.061980473 | 0.126458277 |
| Percent_income_25000_34999        | Percentage of households with income between \$25,000 and \$34,999                                  | Census  | Census          | Public          | <a href="https://www.census.gov/data/data-tools.html">https://www.census.gov/data/data-tools.html</a> | 0.015706806 | 0.091159681 | 0.087026382 | 0.217975938 | 0.040328626 | 0.060300662 | 0.116664113 |
| Percent_income_35000_49999        | Percentage of households with income between \$35,000 and \$49,999                                  | Census  | Census          | Public          | <a href="https://www.census.gov/data/data-tools.html">https://www.census.gov/data/data-tools.html</a> | 0.01298027  | 0.122549783 | 0.117088316 | 0.299559471 | 0.045222834 | 0.090574206 | 0.150957311 |
| Percent_income_50000_64999        | Percentage of households with income between \$50,000 and \$64,999                                  | Census  | Census          | Public          | <a href="https://www.census.gov/data/data-tools.html">https://www.census.gov/data/data-tools.html</a> | 0.004345727 | 0.071876669 | 0.069519166 | 0.170037453 | 0.031344491 | 0.050531569 | 0.089984122 |
| Percent_income_65000_74999        | Percentage of households with income between \$65,000 and \$74,999                                  | Census  | Census          | Public          | <a href="https://www.census.gov/data/data-tools.html">https://www.census.gov/data/data-tools.html</a> | 0.018867925 | 0.096555326 | 0.090892955 | 0.196101595 | 0.037398921 | 0.069904168 | 0.122053606 |
| Percent_income_75000_99999        | Percentage of households with income between \$75,000 and \$99,999                                  | Census  | Census          | Public          | <a href="https://www.census.gov/data/data-tools.html">https://www.census.gov/data/data-tools.html</a> | 0.01752109  | 0.125789342 | 0.128854925 | 0.303319209 | 0.04693969  | 0.091499791 | 0.160875598 |
| Percent_income_rent_interest      | Percentage of households with income from interest, dividends, or net rent                          | Census  | Census          | Public          | <a href="https://www.census.gov/data/data-tools.html">https://www.census.gov/data/data-tools.html</a> | 0           | 0.229730766 | 0.21632747  | 0.556998557 | 0.096454036 | 0.160033036 | 0.289586942 |
| Percent_income_under_10000        | Percentage of households with income under \$10,000                                                 | Census  | Census          | Public          | <a href="https://www.census.gov/data/data-tools.html">https://www.census.gov/data/data-tools.html</a> | 0           | 0.079416119 | 0.058774202 | 0.401123596 | 0.067675094 | 0.03289737  | 0.105029727 |
| Percent_labor_force               | Percentage of individuals aged 16 years or older in the labor force                                 | Census  | Census          | Public          | <a href="https://www.census.gov/data/data-tools.html">https://www.census.gov/data/data-tools.html</a> | 0.241149212 | 0.655730922 | 0.662000626 | 0.939845475 | 0.071614602 | 0.622652908 | 0.701123455 |
| Percent_Less_9th                  | Percentage of residents age 25 years and older whose highest education level is less than 9th grade | Census  | Census          | Public          | <a href="https://www.census.gov/data/data-tools.html">https://www.census.gov/data/data-tools.html</a> | 0           | 0.078688926 | 0.051024768 | 0.371198882 | 0.075185861 | 0.027040007 | 0.098799257 |
| Percent_less_than_HS              | Percentage of residents age 25 years and older who did not complete high school                     | Census  | Census          | Public          | <a href="https://www.census.gov/data/data-tools.html">https://www.census.gov/data/data-tools.html</a> | 0.010496392 | 0.134319669 | 0.10006117  | 0.508912967 | 0.101330594 | 0.064793297 | 0.176808232 |
| Percent_Male                      | Percentage of residents who are male                                                                | Census  | Census          | Public          | <a href="https://www.census.gov/data/data-tools.html">https://www.census.gov/data/data-tools.html</a> | 0.382249742 | 0.486748755 | 0.485727213 | 0.748768473 | 0.037912163 | 0.466521019 | 0.501346218 |
| Percent_Male_00_04                | Percentage of male residents who are 4 years old or younger                                         | Census  | Census          | Public          | <a href="https://www.census.gov/data/data-tools.html">https://www.census.gov/data/data-tools.html</a> | 0           | 0.054557222 | 0.050344936 | 0.18984127  | 0.030612    | 0.033304336 | 0.073290466 |
| Percent_Male_05_14                | Percentage of male residents who are between 5 and 14 years old                                     | Census  | Census          | Public          | <a href="https://www.census.gov/data/data-tools.html">https://www.census.gov/data/data-tools.html</a> | 0           | 0.118079615 | 0.11585671  | 0.291147132 | 0.045836362 | 0.090234485 | 0.143410672 |
| Percent_Male_15_24                | Percentage of male residents who are between 15 and 24 years old                                    | Census  | Census          | Public          | <a href="https://www.census.gov/data/data-tools.html">https://www.census.gov/data/data-tools.html</a> | 0.033479474 | 0.148924203 | 0.126719352 | 0.954       | 0.103767869 | 0.099743077 | 0.164083199 |
| Percent_Male_25_44                | Percentage of male residents who are between 24 and 44 years old                                    | Census  | Census          | Public          | <a href="https://www.census.gov/data/data-tools.html">https://www.census.gov/data/data-tools.html</a> | 0.0176      | 0.25920765  | 0.253707949 | 0.550570962 | 0.077263495 | 0.20888747  | 0.302000564 |
| Percent_Male_45_64                | Percentage of male residents who are between 45 and 64 years old                                    | Census  | Census          | Public          | <a href="https://www.census.gov/data/data-tools.html">https://www.census.gov/data/data-tools.html</a> | 0.0144      | 0.278624962 | 0.286884825 | 0.565217391 | 0.070014656 | 0.232980772 | 0.328763087 |
| Percent_Male_65                   | Percentage of male residents who are 65 years old or older                                          | Census  | Census          | Public          | <a href="https://www.census.gov/data/data-tools.html">https://www.census.gov/data/data-tools.html</a> | 0.003790751 | 0.140606348 | 0.142529542 | 0.406961178 | 0.06038751  | 0.099135559 | 0.178449724 |
| Percent_male_9th_12th_grade       | Percentage of males age 25 years and older whose highest education level is 9th to 12th grade       | Census  | Census          | Public          | <a href="https://www.census.gov/data/data-tools.html">https://www.census.gov/data/data-tools.html</a> | 0           | 0.079202392 | 0.067417581 | 0.272594752 | 0.053951523 | 0.03896006  | 0.112054726 |
| Percent_male_Associates_Degree    | Percentage of males age 25 years and older whose highest education level is an associate's degree   | Census  | Census          | Public          | <a href="https://www.census.gov/data/data-tools.html">https://www.census.gov/data/data-tools.html</a> | 0           | 0.073341231 | 0.074448302 | 0.168037603 | 0.035605776 | 0.048467704 | 0.09980701  |
| Percent_male_Bachelors_Degree     | Percentage of males age 25 years and older whose highest education level is a bachelor's degree     | Census  | Census          | Public          | <a href="https://www.census.gov/data/data-tools.html">https://www.census.gov/data/data-tools.html</a> | 0.00989011  | 0.197420382 | 0.197035447 | 0.516533637 | 0.090209572 | 0.132843479 | 0.249585583 |
| Percent_male_Bachelors_or_higher  | Percentage of males age 25 years and older who completed at least a bachelor's degree               | Census  | Census          | Public          | <a href="https://www.census.gov/data/data-tools.html">https://www.census.gov/data/data-tools.html</a> | 0.027696793 | 0.330954489 | 0.29728787  | 0.916289593 | 0.185799841 | 0.188143789 | 0.441336547 |
| Percent_male_construction_occupa  | Percentage of employed males in natural resources, construction, and maintenance occupations        | Census  | Census          | Public          | <a href="https://www.census.gov/data/data-tools.html">https://www.census.gov/data/data-tools.html</a> | 0           | 0.139599497 | 0.141426474 | 0.405017921 | 0.064460645 | 0.091443701 | 0.17781204  |
| Percent_male_divorced             | Percentage of male residents age 15 years and older who are divorced                                | Census  | Census          | Public          | <a href="https://www.census.gov/data/data-tools.html">https://www.census.gov/data/data-tools.html</a> | 0.003216727 | 0.100129303 | 0.095425403 | 0.275023386 | 0.04450855  | 0.0679717   | 0.122831754 |
| Percent_male_earnings_10000_14999 | Percentage of males aged 16 years and older who earned between \$10,000 and \$14,999                | Census  | Census          | Public          | <a href="https://www.census.gov/data/data-tools.html">https://www.census.gov/data/data-tools.html</a> | 0           | 0.062116942 | 0.05499436  | 0.199569661 | 0.036902751 | 0.035826883 | 0.083852966 |
| Percent_male_earnings_100000_over | Percentage of males aged 16 years and older who earned greater than \$100,000                       | Census  | Census          | Public          | <a href="https://www.census.gov/data/data-tools.html">https://www.census.gov/data/data-tools.html</a> | 0           | 0.113516796 | 0.091854169 | 0.528384279 | 0.094503066 | 0.043113407 | 0.160004481 |
| Percent_male_earnings_15000_24999 | Percentage of males aged 16 years and older who earned between \$15,000 and \$24,999                | Census  | Census          | Public          | <a href="https://www.census.gov/data/data-tools.html">https://www.census.gov/data/data-tools.html</a> | 0.010148322 | 0.118506921 | 0.105683332 | 0.384892086 | 0.066979102 | 0.070185874 | 0.150046419 |

Supplemental File S2-VILLAGE Manuscript Table - v.2021.04.21

| Variable                            | Description                                                                                       | Dataset | Geographic Unit | Level of Access | Location                                                                                              | Min         | Mean        | Median      | Max         | StdDev      | Q1          | Q3          |
|-------------------------------------|---------------------------------------------------------------------------------------------------|---------|-----------------|-----------------|-------------------------------------------------------------------------------------------------------|-------------|-------------|-------------|-------------|-------------|-------------|-------------|
| Percent_male_earnings_25000_3499    | Percentage of males aged 16 years and older who earned between \$25,000 and \$34,999              | Census  | Census          | Public          | <a href="https://www.census.gov/data/data-tools.html">https://www.census.gov/data/data-tools.html</a> | 0.008482564 | 0.119057219 | 0.109574739 | 0.318904594 | 0.05927981  | 0.073641803 | 0.159206825 |
| Percent_male_earnings_35000_4999    | Percentage of males aged 16 years and older who earned between \$35,000 and \$49,999              | Census  | Census          | Public          | <a href="https://www.census.gov/data/data-tools.html">https://www.census.gov/data/data-tools.html</a> | 0           | 0.159125463 | 0.159339149 | 0.326714801 | 0.064209745 | 0.108159691 | 0.20332382  |
| Percent_male_earnings_50000_6499    | Percentage of males aged 16 years and older who earned between \$50,000 and \$64,999              | Census  | Census          | Public          | <a href="https://www.census.gov/data/data-tools.html">https://www.census.gov/data/data-tools.html</a> | 0.005655042 | 0.129950598 | 0.128100243 | 0.273359841 | 0.054431408 | 0.093912871 | 0.166714642 |
| Percent_male_earnings_65000_7499    | Percentage of males aged 16 years and older who earned between \$65,000 and \$74,999              | Census  | Census          | Public          | <a href="https://www.census.gov/data/data-tools.html">https://www.census.gov/data/data-tools.html</a> | 0           | 0.055942867 | 0.052948639 | 0.242362525 | 0.034563254 | 0.031554101 | 0.076030562 |
| Percent_male_earnings_75000_9999    | Percentage of males aged 16 years and older who earned between \$75,000 and \$99,999              | Census  | Census          | Public          | <a href="https://www.census.gov/data/data-tools.html">https://www.census.gov/data/data-tools.html</a> | 0           | 0.085227929 | 0.080244438 | 0.251548947 | 0.051268763 | 0.046286963 | 0.117527699 |
| Percent_male_earnings_under_10000   | Percentage of males aged 16 years and older who earned under \$10,000                             | Census  | Census          | Public          | <a href="https://www.census.gov/data/data-tools.html">https://www.census.gov/data/data-tools.html</a> | 0.014388489 | 0.156555266 | 0.134965574 | 0.896324222 | 0.105946209 | 0.096237171 | 0.180216783 |
| Percent_male_Graduate_Degree        | Percentage of males age 25 years and older whose highest education level is a graduate degree     | Census  | Census          | Public          | <a href="https://www.census.gov/data/data-tools.html">https://www.census.gov/data/data-tools.html</a> | 0           | 0.133534107 | 0.104345332 | 0.713461538 | 0.115763337 | 0.05317816  | 0.179077096 |
| Percent_male_Graduate_or_higher     | Percentage of males age 25 years and older who completed at least a graduate degree               | Census  | Census          | Public          | <a href="https://www.census.gov/data/data-tools.html">https://www.census.gov/data/data-tools.html</a> | 0           | 0.133534107 | 0.104345332 | 0.713461538 | 0.115763337 | 0.05317816  | 0.179077096 |
| Percent_male_High_School            | Percentage of males age 25 years and older whose highest education level is a high school diploma | Census  | Census          | Public          | <a href="https://www.census.gov/data/data-tools.html">https://www.census.gov/data/data-tools.html</a> | 0.015837104 | 0.282234807 | 0.286837617 | 0.536796537 | 0.098114586 | 0.215379055 | 0.35337325  |
| Percent_male_High_school_or_higher  | Percentage of males age 25 years and older who completed at least high school                     | Census  | Census          | Public          | <a href="https://www.census.gov/data/data-tools.html">https://www.census.gov/data/data-tools.html</a> | 0.476070529 | 0.861750885 | 0.89582831  | 1           | 0.105801414 | 0.821097264 | 0.935323513 |
| Percent_male_householder            | Percentage of households with male householder (no spouse present) with children                  | Census  | Census          | Public          | <a href="https://www.census.gov/data/data-tools.html">https://www.census.gov/data/data-tools.html</a> | 0           | 0.078552315 | 0.070246329 | 0.294       | 0.051819251 | 0.037709121 | 0.113419651 |
| Percent_male_householder_with_child | Percentage of households with male householder (no spouse present)                                | Census  | Census          | Public          | <a href="https://www.census.gov/data/data-tools.html">https://www.census.gov/data/data-tools.html</a> | 0           | 0.035102235 | 0.024510246 | 0.167055167 | 0.034960126 | 0.010229788 | 0.054025989 |
| Percent_male_Less_9th               | Percentage of males age 25 years and older whose highest education level is less than 9th grade   | Census  | Census          | Public          | <a href="https://www.census.gov/data/data-tools.html">https://www.census.gov/data/data-tools.html</a> | 0           | 0.059046723 | 0.038225701 | 0.353274559 | 0.066225363 | 0.015418764 | 0.071802    |
| Percent_male_less_than_HS           | Percentage of males age 25 years and older who did not complete high school                       | Census  | Census          | Public          | <a href="https://www.census.gov/data/data-tools.html">https://www.census.gov/data/data-tools.html</a> | 0           | 0.138249115 | 0.104171691 | 0.523929471 | 0.105801414 | 0.064676487 | 0.178902737 |
| Percent_male_management_occupati    | Percentage of employed males in management, business, science, and arts occupations               | Census  | Census          | Public          | <a href="https://www.census.gov/data/data-tools.html">https://www.census.gov/data/data-tools.html</a> | 0.017492711 | 0.33205487  | 0.318118246 | 0.843230404 | 0.142303673 | 0.233604821 | 0.418024757 |
| Percent_male_never_married          | Percentage of male residents age 15 years and older who were never married                        | Census  | Census          | Public          | <a href="https://www.census.gov/data/data-tools.html">https://www.census.gov/data/data-tools.html</a> | 0.177592372 | 0.388133924 | 0.360662528 | 0.970245275 | 0.133160535 | 0.285301587 | 0.46161348  |
| Percent_male_now_married            | Percentage of male residents age 15 years and older who are now married                           | Census  | Census          | Public          | <a href="https://www.census.gov/data/data-tools.html">https://www.census.gov/data/data-tools.html</a> | 0.024929634 | 0.485723111 | 0.497538052 | 0.73907979  | 0.129575166 | 0.401237736 | 0.590422899 |
| Percent_male_production_occupati    | Percentage of employed males in production, transportation, and material moving occupations       | Census  | Census          | Public          | <a href="https://www.census.gov/data/data-tools.html">https://www.census.gov/data/data-tools.html</a> | 0.004456328 | 0.169664946 | 0.157299225 | 0.473726115 | 0.086536701 | 0.107812839 | 0.221198107 |
| Percent_male_sales_occupations      | Percentage of employed males in sales and office occupations                                      | Census  | Census          | Public          | <a href="https://www.census.gov/data/data-tools.html">https://www.census.gov/data/data-tools.html</a> | 0.039426523 | 0.174819582 | 0.167690734 | 0.411994785 | 0.057632417 | 0.137483958 | 0.209218269 |
| Percent_male_service_occupations    | Percentage of employed males in service occupations                                               | Census  | Census          | Public          | <a href="https://www.census.gov/data/data-tools.html">https://www.census.gov/data/data-tools.html</a> | 0.016627078 | 0.183861106 | 0.174061535 | 0.462566845 | 0.07632138  | 0.126500194 | 0.226907797 |
| Percent_male_Some_College           | Percentage of males age 25 years and older whose highest education level is some college          | Census  | Census          | Public          | <a href="https://www.census.gov/data/data-tools.html">https://www.census.gov/data/data-tools.html</a> | 0.034524531 | 0.175220357 | 0.175075593 | 0.398993077 | 0.055114651 | 0.137952496 | 0.209891417 |
| Percent_male_Some_college_or_higher | Percentage of males age 25 years and older who completed at least some college                    | Census  | Census          | Public          | <a href="https://www.census.gov/data/data-tools.html">https://www.census.gov/data/data-tools.html</a> | 0.177581864 | 0.579516078 | 0.584738372 | 0.960024228 | 0.16819116  | 0.462549213 | 0.700090435 |
| Percent_male_widowed                | Percentage of male residents age 15 years and older who are widowed                               | Census  | Census          | Public          | <a href="https://www.census.gov/data/data-tools.html">https://www.census.gov/data/data-tools.html</a> | 0           | 0.026013662 | 0.0224614   | 0.104157354 | 0.019102735 | 0.011222863 | 0.036871213 |
| Percent_management_occupations      | Percentage of employed individuals in management, business, science, and arts occupations         | Census  | Census          | Public          | <a href="https://www.census.gov/data/data-tools.html">https://www.census.gov/data/data-tools.html</a> | 0.037340153 | 0.367879524 | 0.367196891 | 0.873710277 | 0.134999294 | 0.267725536 | 0.444195392 |
| Percent_never_married               | Percentage of residents age 15 years and older who were never married                             | Census  | Census          | Public          | <a href="https://www.census.gov/data/data-tools.html">https://www.census.gov/data/data-tools.html</a> | 0.148467967 | 0.360144226 | 0.321198644 | 0.972217275 | 0.131178237 | 0.26592142  | 0.436989149 |
| Percent_No_Insurance                | Percentage of residents without health insurance                                                  | Census  | Census          | Public          | <a href="https://www.census.gov/data/data-tools.html">https://www.census.gov/data/data-tools.html</a> | 0           | 0.082241837 | 0.063522846 | 0.350098836 | 0.059378162 | 0.041094626 | 0.115612849 |
| Percent_now_married                 | Percentage of residents age 15 years and older who are now married                                | Census  | Census          | Public          | <a href="https://www.census.gov/data/data-tools.html">https://www.census.gov/data/data-tools.html</a> | 0.020480855 | 0.460673741 | 0.466000021 | 0.71184253  | 0.12164748  | 0.38344774  | 0.554347011 |
| Percent_occupied_housing            | Percentage of housing units that are occupied                                                     | Census  | Census          | Public          | <a href="https://www.census.gov/data/data-tools.html">https://www.census.gov/data/data-tools.html</a> | 0.246018671 | 0.889528194 | 0.905804922 | 1           | 0.092350558 | 0.877519092 | 0.942989385 |
| Percent_owner_occupied              | Percentage of housing units occupied by owners                                                    | Census  | Census          | Public          | <a href="https://www.census.gov/data/data-tools.html">https://www.census.gov/data/data-tools.html</a> | 0           | 0.580225699 | 0.617790119 | 0.975845411 | 0.239700702 | 0.387555649 | 0.76923459  |
| Percent_owner_occupied_with_mort    | Percentage of owner-occupied units with mortgage, contract, or similar purchase debt              | Census  | Census          | Public          | <a href="https://www.census.gov/data/data-tools.html">https://www.census.gov/data/data-tools.html</a> | 0           | 0.692956222 | 0.702512214 | 0.892376682 | 0.104135367 | 0.651456447 | 0.751943097 |
| Percent_production_occupations      | Percentage of employed individuals in production, transportation, and material moving occupations | Census  | Census          | Public          | <a href="https://www.census.gov/data/data-tools.html">https://www.census.gov/data/data-tools.html</a> | 0.006704981 | 0.116228822 | 0.099334131 | 0.38488121  | 0.065659614 | 0.069158713 | 0.149993847 |
| Percent_renter_occupied             | Percentage of housing units occupied by renters                                                   | Census  | Census          | Public          | <a href="https://www.census.gov/data/data-tools.html">https://www.census.gov/data/data-tools.html</a> | 0.024154589 | 0.419774301 | 0.382209882 | 1           | 0.239700702 | 0.23076541  | 0.612444351 |
| Percent_renter_occupied_with_utili  | Percentage of renter occupied units with utilities included in rent                               | Census  | Census          | Public          | <a href="https://www.census.gov/data/data-tools.html">https://www.census.gov/data/data-tools.html</a> | 0           | 0.189210603 | 0.161180476 | 0.925925926 | 0.157265904 | 0.070239557 | 0.267904099 |
| Percent_sales_occupations           | Percentage of employed individuals in sales and office occupations                                | Census  | Census          | Public          | <a href="https://www.census.gov/data/data-tools.html">https://www.census.gov/data/data-tools.html</a> | 0.073049938 | 0.236674797 | 0.235146613 | 0.373972603 | 0.052669739 | 0.200350877 | 0.269457115 |



Supplemental File S2-VILLAGE Manuscript Table - v.2021.04.21

| Variable                            | Description                                                                                  | Dataset | Geographic Unit | Level of Access | Location                                                                                              | Min         | Mean        | Median      | Max         | StdDev      | Q1          | Q3          |
|-------------------------------------|----------------------------------------------------------------------------------------------|---------|-----------------|-----------------|-------------------------------------------------------------------------------------------------------|-------------|-------------|-------------|-------------|-------------|-------------|-------------|
| Percent_service_occupations         | Percentage of employed individuals in service occupations                                    | Census  | Census          | Public          | <a href="https://www.census.gov/data/data-tools.html">https://www.census.gov/data/data-tools.html</a> | 0.023937268 | 0.205244533 | 0.192980335 | 0.421366594 | 0.073805532 | 0.153262836 | 0.253976242 |
| Percent_Some_College                | Percentage of residents age 25 years and older whose highest education level is some college | Census  | Census          | Public          | <a href="https://www.census.gov/data/data-tools.html">https://www.census.gov/data/data-tools.html</a> | 0.02244898  | 0.182885678 | 0.18603327  | 0.334665905 | 0.04833547  | 0.154047764 | 0.210010785 |
| Percent_Some_college_or_higher      | Percentage of residents age 25 years and older who completed at least some college           | Census  | Census          | Public          | <a href="https://www.census.gov/data/data-tools.html">https://www.census.gov/data/data-tools.html</a> | 0.182453688 | 0.592590239 | 0.601793128 | 0.963547995 | 0.153370889 | 0.493352996 | 0.698309737 |
| Percent_speaking_English_only       | Percentage of households speaking English only                                               | Census  | Census          | Public          | <a href="https://www.census.gov/data/data-tools.html">https://www.census.gov/data/data-tools.html</a> | 0.21039604  | 0.761186501 | 0.834934955 | 0.962320278 | 0.18595388  | 0.686651153 | 0.894062628 |
| Percent_speaking_Limited_English    | Percentage of households speaking limited English                                            | Census  | Census          | Public          | <a href="https://www.census.gov/data/data-tools.html">https://www.census.gov/data/data-tools.html</a> | 0           | 0.055624316 | 0.023609747 | 0.416607523 | 0.077239019 | 0.00627973  | 0.071433615 |
| Percent_speaking_Other_Language     | Percentage of households speaking a language other than English or Spanish                   | Census  | Census          | Public          | <a href="https://www.census.gov/data/data-tools.html">https://www.census.gov/data/data-tools.html</a> | 0.017821782 | 0.124042    | 0.111837359 | 0.438915707 | 0.070399138 | 0.07504471  | 0.157390933 |
| Percent_speaking_Spanish            | Percentage of households speaking Spanish                                                    | Census  | Census          | Public          | <a href="https://www.census.gov/data/data-tools.html">https://www.census.gov/data/data-tools.html</a> | 0           | 0.114771499 | 0.046387552 | 0.678378378 | 0.160187933 | 0.019697887 | 0.117733594 |
| Percent_speaking_Spanish_LE         | Percentage of households speaking Spanish (with limited English)                             | Census  | Census          | Public          | <a href="https://www.census.gov/data/data-tools.html">https://www.census.gov/data/data-tools.html</a> | 0           | 0.033205151 | 0           | 0.374024131 | 0.062969127 | 0           | 0.033237736 |
| Percent_unemployed                  | Percentage of individuals aged 16 years or older unemployed                                  | Census  | Census          | Public          | <a href="https://www.census.gov/data/data-tools.html">https://www.census.gov/data/data-tools.html</a> | 0.003623188 | 0.07875717  | 0.071158719 | 0.224264706 | 0.04146166  | 0.049442256 | 0.098101184 |
| Percent_units_coal_heating          | Percentage of housing units using coal or coke as heating fuel                               | Census  | Census          | Public          | <a href="https://www.census.gov/data/data-tools.html">https://www.census.gov/data/data-tools.html</a> | 0           | 0.001117922 | 0           | 0.027689873 | 0.003675852 | 0           | 0           |
| Percent_units_complete_kitchen      | Percentage of housing units with complete kitchen services                                   | Census  | Census          | Public          | <a href="https://www.census.gov/data/data-tools.html">https://www.census.gov/data/data-tools.html</a> | 0.832128514 | 0.975210074 | 0.983417673 | 1           | 0.025594581 | 0.961700228 | 0.995764269 |
| Percent_units_complete_plumbing     | Percentage of housing units with complete plumbing services                                  | Census  | Census          | Public          | <a href="https://www.census.gov/data/data-tools.html">https://www.census.gov/data/data-tools.html</a> | 0.919163369 | 0.987253931 | 0.99500277  | 1           | 0.017325376 | 0.97877193  | 1           |
| Percent_units_electric_heating      | Percentage of housing units using electricity as heating fuel                                | Census  | Census          | Public          | <a href="https://www.census.gov/data/data-tools.html">https://www.census.gov/data/data-tools.html</a> | 0           | 0.099570106 | 0.089572636 | 0.438993711 | 0.066034693 | 0.057394632 | 0.129931736 |
| Percent_units_moved_in_1979_earlier | Percentage of housing units whose current residents moved in before 1980                     | Census  | Census          | Public          | <a href="https://www.census.gov/data/data-tools.html">https://www.census.gov/data/data-tools.html</a> | 0           | 0.108878157 | 0.109661538 | 0.266946611 | 0.053625903 | 0.068882404 | 0.144663521 |
| Percent_units_moved_in_1980_1989    | Percentage of housing units whose current residents moved in between 1980 and 1989           | Census  | Census          | Public          | <a href="https://www.census.gov/data/data-tools.html">https://www.census.gov/data/data-tools.html</a> | 0           | 0.079476453 | 0.08052644  | 0.188545362 | 0.040963208 | 0.044649691 | 0.108486659 |
| Percent_units_moved_in_1990_1999    | Percentage of housing units whose current residents moved in between 1990 and 1999           | Census  | Census          | Public          | <a href="https://www.census.gov/data/data-tools.html">https://www.census.gov/data/data-tools.html</a> | 0.013232514 | 0.146485978 | 0.139040027 | 0.297945205 | 0.058342543 | 0.103853807 | 0.18670463  |
| Percent_units_moved_in_2000_2009    | Percentage of housing units whose current residents moved in between 2000 and 2009           | Census  | Census          | Public          | <a href="https://www.census.gov/data/data-tools.html">https://www.census.gov/data/data-tools.html</a> | 0.071833648 | 0.301035909 | 0.299277357 | 0.481858689 | 0.063424452 | 0.264267972 | 0.347846855 |
| Percent_units_moved_in_2010_later   | Percentage of housing units whose current residents moved in after 2009                      | Census  | Census          | Public          | <a href="https://www.census.gov/data/data-tools.html">https://www.census.gov/data/data-tools.html</a> | 32          | 602.6583333 | 565.5       | 1520        | 290.4550749 | 391         | 781         |
| Percent_units_no_car                | Percentage of housing units with no car                                                      | Census  | Census          | Public          | <a href="https://www.census.gov/data/data-tools.html">https://www.census.gov/data/data-tools.html</a> | 0           | 0.103588138 | 0.06980636  | 0.517610063 | 0.094031119 | 0.038778394 | 0.141917265 |
| Percent_units_oil_heating           | Percentage of housing units using fuel oil or kerosene as heating fuel                       | Census  | Census          | Public          | <a href="https://www.census.gov/data/data-tools.html">https://www.census.gov/data/data-tools.html</a> | 0.013861386 | 0.309811149 | 0.263667855 | 0.837053571 | 0.201850296 | 0.157471914 | 0.41688532  |
| Percent_units_solar_heating         | Percentage of housing units using solar energy as heating fuel                               | Census  | Census          | Public          | <a href="https://www.census.gov/data/data-tools.html">https://www.census.gov/data/data-tools.html</a> | 0           | 0.000254287 | 0           | 0.009168704 | 0.001321751 | 0           | 0           |
| Percent_units_tank_gas_heating      | Percentage of housing units using bottled, tank, or LP gas as heating fuel                   | Census  | Census          | Public          | <a href="https://www.census.gov/data/data-tools.html">https://www.census.gov/data/data-tools.html</a> | 0           | 0.026404089 | 0.018615703 | 0.179966044 | 0.027191569 | 0.009475121 | 0.035829706 |
| Percent_units_telephone_service     | Percentage of housing units with telephone service available                                 | Census  | Census          | Public          | <a href="https://www.census.gov/data/data-tools.html">https://www.census.gov/data/data-tools.html</a> | 0.896030246 | 0.978960772 | 0.981824165 | 1           | 0.017949448 | 0.970900958 | 0.993240658 |
| Percent_units_utility_gas_heating   | Percentage of housing units using utility gas as heating fuel                                | Census  | Census          | Public          | <a href="https://www.census.gov/data/data-tools.html">https://www.census.gov/data/data-tools.html</a> | 0           | 0.537825481 | 0.613622221 | 0.873212583 | 0.232307521 | 0.404953242 | 0.71417501  |
| Percent_units_wood_heating          | Percentage of housing units using wood at heating fuel                                       | Census  | Census          | Public          | <a href="https://www.census.gov/data/data-tools.html">https://www.census.gov/data/data-tools.html</a> | 0           | 0.016801312 | 0.005228    | 0.22655795  | 0.031670305 | 0           | 0.019289393 |
| Percent_vacant_for_rent             | Percentage of vacant housing units that are for rent                                         | Census  | Census          | Public          | <a href="https://www.census.gov/data/data-tools.html">https://www.census.gov/data/data-tools.html</a> | 0           | 0.221944192 | 0.21140581  | 0.897058824 | 0.21474681  | 0           | 0.372713711 |
| Percent_vacant_for_sale             | Percentage of vacant housing units that are for sale                                         | Census  | Census          | Public          | <a href="https://www.census.gov/data/data-tools.html">https://www.census.gov/data/data-tools.html</a> | 0           | 0.112214506 | 0.016005884 | 1           | 0.171689335 | 0           | 0.174053296 |
| Percent_vacant_housing              | Percentage of housing units that are vacant                                                  | Census  | Census          | Public          | <a href="https://www.census.gov/data/data-tools.html">https://www.census.gov/data/data-tools.html</a> | 0           | 0.110471806 | 0.094195078 | 0.753981329 | 0.092350558 | 0.057010615 | 0.122480908 |
| Percent_vacant_rented_unoccupied    | Percentage of vacant housing units that are rented but unoccupied                            | Census  | Census          | Public          | <a href="https://www.census.gov/data/data-tools.html">https://www.census.gov/data/data-tools.html</a> | 0           | 0.062772762 | 0           | 1           | 0.125675372 | 0           | 0.09301841  |
| Percent_vacant_seasonal_use         | Percentage of vacant housing units that are for seasonal, recreational, or occasional use    | Census  | Census          | Public          | <a href="https://www.census.gov/data/data-tools.html">https://www.census.gov/data/data-tools.html</a> | 0           | 0.18873219  | 0           | 1           | 0.2772696   | 0           | 0.276897425 |
| Percent_vacant_sold_unoccupied      | Percentage of vacant housing units that are sold but unoccupied                              | Census  | Census          | Public          | <a href="https://www.census.gov/data/data-tools.html">https://www.census.gov/data/data-tools.html</a> | 0           | 0.026697809 | 0           | 1           | 0.095385721 | 0           | 0           |
| Percent_veteran                     | Percentage of individuals aged 18 years or older who are veterans                            | Census  | Census          | Public          | <a href="https://www.census.gov/data/data-tools.html">https://www.census.gov/data/data-tools.html</a> | 0.012797404 | 0.164092301 | 0.169765402 | 0.386313466 | 0.053067394 | 0.126807647 | 0.204932501 |
| Percent_veteran_female              | Percentage of veterans who are female                                                        | Census  | Census          | Public          | <a href="https://www.census.gov/data/data-tools.html">https://www.census.gov/data/data-tools.html</a> | 0.19138756  | 0.582201984 | 0.581008068 | 0.899099099 | 0.104510484 | 0.511838768 | 0.648577553 |
| Percent_veteran_Gulf_1              | Percentage of veterans who served in Gulf War (1990 to 2000)                                 | Census  | Census          | Public          | <a href="https://www.census.gov/data/data-tools.html">https://www.census.gov/data/data-tools.html</a> | 0           | 0.129827985 | 0.118360915 | 0.580327869 | 0.106250848 | 0.046649396 | 0.188199736 |
| Percent_veteran_Gulf_2              | Percentage of veterans who served in Gulf War (2001 or later)                                | Census  | Census          | Public          | <a href="https://www.census.gov/data/data-tools.html">https://www.census.gov/data/data-tools.html</a> | 0           | 0.129875645 | 0.111766967 | 0.785276074 | 0.128372208 | 0.044741001 | 0.17418128  |
| Percent_veteran_Korea               | Percentage of veterans who served in the Korean War                                          | Census  | Census          | Public          | <a href="https://www.census.gov/data/data-tools.html">https://www.census.gov/data/data-tools.html</a> | 0           | 0.126970379 | 0.104100521 | 0.565217391 | 0.100293218 | 0.0567296   | 0.181695547 |
| Percent_veteran_male                | Percentage of veterans who are male                                                          | Census  | Census          | Public          | <a href="https://www.census.gov/data/data-tools.html">https://www.census.gov/data/data-tools.html</a> | 0.100900901 | 0.417798016 | 0.418991933 | 0.80861244  | 0.104510484 | 0.351422447 | 0.488161233 |
| Percent_veteran_Vietnam             | Percentage of veterans who served in the Vietnam Era                                         | Census  | Census          | Public          | <a href="https://www.census.gov/data/data-tools.html">https://www.census.gov/data/data-tools.html</a> | 0           | 0.334709815 | 0.339357748 | 0.705882353 | 0.134973449 | 0.241151698 | 0.432523009 |

**Supplemental File S2-VILLAGE Manuscript Table - v.2021.04.21**

| Variable                    | Description                                                                                                 | Dataset  | Geographic Unit | Level of Access | Location                                                                                                        | Min         | Mean        | Median      | Max         | StdDev      | Q1          | Q3          |
|-----------------------------|-------------------------------------------------------------------------------------------------------------|----------|-----------------|-----------------|-----------------------------------------------------------------------------------------------------------------|-------------|-------------|-------------|-------------|-------------|-------------|-------------|
| Percent_veteran_WWII        | Percentage of veterans who served in World War II                                                           | Census   | Census          | Public          | <a href="https://www.census.gov/data/data-tools.html">https://www.census.gov/data/data-tools.html</a>           | 0           | 0.078310867 | 0.063214954 | 0.431578947 | 0.076368682 | 0           | 0.118732465 |
| Percent_White_NH            | Percentage of residents who are White (non-Hispanic/Latino)                                                 | Census   | Census          | Public          | <a href="https://www.census.gov/data/data-tools.html">https://www.census.gov/data/data-tools.html</a>           | 0.031342651 | 0.738682535 | 0.854683075 | 0.988498789 | 0.256491395 | 0.658864749 | 0.926851478 |
| Percent_widowed             | Percentage of residents age 15 years and older who are widowed                                              | Census   | Census          | Public          | <a href="https://www.census.gov/data/data-tools.html">https://www.census.gov/data/data-tools.html</a>           | 0.000890472 | 0.063110407 | 0.059460867 | 0.141350812 | 0.026983487 | 0.045501268 | 0.078940739 |
| Percent_Work_Commute_Car    | Percentage of workers who commute to work via car, truck, or van                                            | Census   | Census          | Public          | <a href="https://www.census.gov/data/data-tools.html">https://www.census.gov/data/data-tools.html</a>           | 0.26125331  | 0.874383985 | 0.917805371 | 0.988062941 | 0.11962187  | 0.842065392 | 0.949084372 |
| Percent_Work_Commute_Public | Percentage of workers who commute to work via public transportation                                         | Census   | Census          | Public          | <a href="https://www.census.gov/data/data-tools.html">https://www.census.gov/data/data-tools.html</a>           | 0           | 0.028750702 | 0.018246883 | 0.195631529 | 0.030967157 | 0.007240858 | 0.039323904 |
| RIPTA_park                  | RIPTA park & ride lots                                                                                      | RIGIS    | Point           | Public          | <a href="http://www.rigis.org/">http://www.rigis.org/</a>                                                       | 0           | 0.175       | 0           | 3           | 0.503751616 | 0           | 0           |
| RIPTA_stop                  | RIPTA bus stops                                                                                             | RIGIS    | Point           | Public          | <a href="http://www.rigis.org/">http://www.rigis.org/</a>                                                       | 0           | 20.8        | 16.5        | 306         | 24.86838998 | 7.5         | 28          |
| Svi_Area_Sqmi               | <a href="#">Social Vulnerability Index</a>                                                                  | 2016 SVI | Census          | Public          | <a href="https://svi.cdc.gov/data-and-tools-download.html">https://svi.cdc.gov/data-and-tools-download.html</a> | 0.1177356   | 4.302023506 | 1.1577448   | 57.4661001  | 8.57714512  | 0.4918333   | 3.27022815  |
| Svi_E_Age17                 | Persons aged 17 and younger estimate, 2012-2016 ACS                                                         | 2016 SVI | Census          | Public          | <a href="https://svi.cdc.gov/data-and-tools-download.html">https://svi.cdc.gov/data-and-tools-download.html</a> | 47          | 885.025     | 831.5       | 2505        | 426.44085   | 575.5       | 1167        |
| Svi_E_Age65                 | Persons aged 65 and older estimate, 2012-2016 ACS                                                           | 2016 SVI | Census          | Public          | <a href="https://svi.cdc.gov/data-and-tools-download.html">https://svi.cdc.gov/data-and-tools-download.html</a> | 42          | 693.8208333 | 650         | 1761        | 353.4695533 | 407         | 933.5       |
| Svi_E_Crowd                 | At household level (occupied housing units), more people than rooms estimate, 2012- 2016 ACS                | 2016 SVI | Census          | Public          | <a href="https://svi.cdc.gov/data-and-tools-download.html">https://svi.cdc.gov/data-and-tools-download.html</a> | 0           | 27.98333333 | 16          | 174         | 35.68433979 | 0           | 40          |
| Svi_E_Daypop                | Adjunct variable - Estimated daytime population, LandScan 2016                                              | 2016 SVI | Census          | Public          | <a href="https://svi.cdc.gov/data-and-tools-download.html">https://svi.cdc.gov/data-and-tools-download.html</a> | 476         | 4404.329167 | 3294        | 36517       | 4120.094645 | 2114.5      | 5109        |
| Svi_E_Disabl                | Civilian noninstitutionalized population with a disability estimate, 2012-2016 ACS                          | 2016 SVI | Census          | Public          | <a href="https://svi.cdc.gov/data-and-tools-download.html">https://svi.cdc.gov/data-and-tools-download.html</a> | 61          | 566.675     | 525.5       | 1268        | 245.2369928 | 389         | 738.5       |
| Svi_E_Groupq                | Persons in institutionalized group quarters estimate, 2012-2016 ACS                                         | 2016 SVI | Census          | Public          | <a href="https://svi.cdc.gov/data-and-tools-download.html">https://svi.cdc.gov/data-and-tools-download.html</a> | 0           | 175.6166667 | 19          | 5088        | 573.9285259 | 5           | 121         |
| Svi_E_Hh                    | Households estimate, 2012- 2016 ACS                                                                         | 2016 SVI | Census          | Public          | <a href="https://svi.cdc.gov/data-and-tools-download.html">https://svi.cdc.gov/data-and-tools-download.html</a> | 217         | 1709.333333 | 1693.5      | 3348        | 610.3487285 | 1237        | 2077        |
| Svi_E_Hu                    | Housing units estimate, 2012- 2016 ACS                                                                      | 2016 SVI | Census          | Public          | <a href="https://svi.cdc.gov/data-and-tools-download.html">https://svi.cdc.gov/data-and-tools-download.html</a> | 243         | 1927.7375   | 1869.5      | 3812        | 673.3251481 | 1457.5      | 2322.5      |
| Svi_E_Limeng                | Persons (age 5+) who speak English "less than well" estimate, 2012-2016 ACS                                 | 2016 SVI | Census          | Public          | <a href="https://svi.cdc.gov/data-and-tools-download.html">https://svi.cdc.gov/data-and-tools-download.html</a> | 0           | 187.8458333 | 61          | 2116        | 319.7085839 | 19          | 205.5       |
| Svi_E_Minrty                | Minority (all persons except white, nonHispanic) estimate, 2012-2016 ACS                                    | 2016 SVI | Census          | Public          | <a href="https://svi.cdc.gov/data-and-tools-download.html">https://svi.cdc.gov/data-and-tools-download.html</a> | 39          | 1142.554167 | 606.5       | 7562        | 1323.407333 | 316.5       | 1288.5      |
| Svi_E_Mobile                | Mobile homes estimate, 2012- 2016 ACS                                                                       | 2016 SVI | Census          | Public          | <a href="https://svi.cdc.gov/data-and-tools-download.html">https://svi.cdc.gov/data-and-tools-download.html</a> | 0           | 19.52916667 | 0           | 406         | 54.29833118 | 0           | 8           |
| Svi_E_Munit                 | Housing in structures with 10 or more units estimate, 2012-2016 ACS                                         | 2016 SVI | Census          | Public          | <a href="https://svi.cdc.gov/data-and-tools-download.html">https://svi.cdc.gov/data-and-tools-download.html</a> | 0           | 226.175     | 147         | 1871        | 263.5445914 | 39.5        | 329.5       |
| Svi_E_Nohsdp                | Persons (age 25+) with no high school diploma estimate, 2012-2016 ACS                                       | 2016 SVI | Census          | Public          | <a href="https://svi.cdc.gov/data-and-tools-download.html">https://svi.cdc.gov/data-and-tools-download.html</a> | 3           | 393.9916667 | 308         | 2154        | 319.7470757 | 191.5       | 499.5       |
| Svi_E_Noveh                 | Households with no vehicle available estimate, 2012-2016 ACS                                                | 2016 SVI | Census          | Public          | <a href="https://svi.cdc.gov/data-and-tools-download.html">https://svi.cdc.gov/data-and-tools-download.html</a> | 0           | 168.4666667 | 121         | 867         | 152.8386593 | 62          | 234         |
| Svi_E_Pci                   | Per capita income estimate, 2012- 2016 ACS                                                                  | 2016 SVI | Census          | Public          | <a href="https://svi.cdc.gov/data-and-tools-download.html">https://svi.cdc.gov/data-and-tools-download.html</a> | 5355        | 31994.87917 | 31313.5     | 90921       | 12314.5096  | 23242.5     | 39219       |
| Svi_E_Pov                   | Persons below poverty estimate, 2012-2016 ACS                                                               | 2016 SVI | Census          | Public          | <a href="https://svi.cdc.gov/data-and-tools-download.html">https://svi.cdc.gov/data-and-tools-download.html</a> | 28          | 584.0041667 | 420.5       | 2580        | 507.487564  | 223         | 812.5       |
| Svi_E_Sngpnt                | Single parent household with children under 18 estimate, 2012-2016 ACS                                      | 2016 SVI | Census          | Public          | <a href="https://svi.cdc.gov/data-and-tools-download.html">https://svi.cdc.gov/data-and-tools-download.html</a> | 0           | 166.7125    | 128         | 680         | 134.1197423 | 74          | 212         |
| Svi_E_Totpop                | Population estimate, 2012- 2016 ACS                                                                         | 2016 SVI | Census          | Public          | <a href="https://svi.cdc.gov/data-and-tools-download.html">https://svi.cdc.gov/data-and-tools-download.html</a> | 885         | 4393.7125   | 4353.5      | 8561        | 1536.43083  | 3179        | 5513        |
| Svi_E_Unemp                 | Civilian (age 16+) unemployed estimate, 2012- 2016 ACS                                                      | 2016 SVI | Census          | Public          | <a href="https://svi.cdc.gov/data-and-tools-download.html">https://svi.cdc.gov/data-and-tools-download.html</a> | 6           | 181.6666667 | 158         | 773         | 116.2248818 | 99.5        | 229         |
| Svi_E_Uninsur               | Adjunct variable - Uninsured in the total civilian noninstitutionalized population estimate, 2012- 2016 ACS | 2016 SVI | Census          | Public          | <a href="https://svi.cdc.gov/data-and-tools-download.html">https://svi.cdc.gov/data-and-tools-download.html</a> | 0           | 347.625     | 264         | 2125        | 304.3134275 | 168         | 397         |
| Svi_Ep_Age17                | Percentage of persons aged 17 and younger estimate, 2012-2016 ACS                                           | 2016 SVI | Census          | Public          | <a href="https://svi.cdc.gov/data-and-tools-download.html">https://svi.cdc.gov/data-and-tools-download.html</a> | 1.4         | 19.90541667 | 19.7        | 35.1        | 5.993030456 | 16.9        | 22.85       |
| Svi_Ep_Age65                | Percentage of persons aged 65 and older estimate, 2012- 2016 ACS                                            | 2016 SVI | Census          | Public          | <a href="https://svi.cdc.gov/data-and-tools-download.html">https://svi.cdc.gov/data-and-tools-download.html</a> | 0.8         | 15.95541667 | 16          | 42.3        | 6.322978271 | 11.35       | 20          |
| Svi_Ep_Crowd                | Percentage of occupied housing units with more people than rooms estimate                                   | 2016 SVI | Census          | Public          | <a href="https://svi.cdc.gov/data-and-tools-download.html">https://svi.cdc.gov/data-and-tools-download.html</a> | 0           | 1.720416667 | 0.9         | 9.5         | 2.039884686 | 0           | 2.7         |
| Svi_Ep_Disabl               | Percentage of civilian noninstitutionalized population with a disability estimate, 2012- 2016 ACS           | 2016 SVI | Census          | Public          | <a href="https://svi.cdc.gov/data-and-tools-download.html">https://svi.cdc.gov/data-and-tools-download.html</a> | 2.4         | 13.28875    | 13.15       | 34.7        | 4.047541547 | 10.8        | 15.8        |
| Svi_Ep_Groupq               | Percentage of persons in institutionalized group quarters estimate, 2012-2016 ACS                           | 2016 SVI | Census          | Public          | <a href="https://svi.cdc.gov/data-and-tools-download.html">https://svi.cdc.gov/data-and-tools-download.html</a> | 0           | 3.79875     | 0.5         | 90.4        | 11.57409993 | 0.15        | 2.4         |
| Svi_Ep_Limeng               | Percentage of persons (age 5+) who speak English "less than well" estimate, 2012- 2016 ACS                  | 2016 SVI | Census          | Public          | <a href="https://svi.cdc.gov/data-and-tools-download.html">https://svi.cdc.gov/data-and-tools-download.html</a> | 0           | 4.522083333 | 1.5         | 34.7        | 6.659649606 | 0.5         | 6.1         |
| Svi_Ep_Minrty               | Percentage minority (all persons except white, nonHispanic) estimate, 2012-2016 ACS                         | 2016 SVI | Census          | Public          | <a href="https://svi.cdc.gov/data-and-tools-download.html">https://svi.cdc.gov/data-and-tools-download.html</a> | 1.2         | 26.13125    | 14.5        | 96.9        | 25.65029673 | 7.3         | 34.1        |

**Supplemental File S2-VILLAGE Manuscript Table - v.2021.04.21**

| Variable        | Description                                                                                                            | Dataset  | Geographic Unit | Level of Access | Location                                                                                                        | Min  | Mean        | Median  | Max    | StdDev      | Q1      | Q3      |
|-----------------|------------------------------------------------------------------------------------------------------------------------|----------|-----------------|-----------------|-----------------------------------------------------------------------------------------------------------------|------|-------------|---------|--------|-------------|---------|---------|
| Svi_Ep_Mobile   | Percentage of mobile homes estimate                                                                                    | 2016 SVI | Census          | Public          | <a href="https://svi.cdc.gov/data-and-tools-download.html">https://svi.cdc.gov/data-and-tools-download.html</a> | 0    | 0.910416667 | 0       | 24.7   | 2.599327205 | 0       | 0.5     |
| Svi_Ep_Munit    | Percentage of housing in structures with 10 or more units estimate                                                     | 2016 SVI | Census          | Public          | <a href="https://svi.cdc.gov/data-and-tools-download.html">https://svi.cdc.gov/data-and-tools-download.html</a> | 0    | 11.53333333 | 8       | 92.3   | 12.70780957 | 2.4     | 16.8    |
| Svi_Ep_Noahsdp  | Percentage of persons with no high school diploma (age 25+) estimate                                                   | 2016 SVI | Census          | Public          | <a href="https://svi.cdc.gov/data-and-tools-download.html">https://svi.cdc.gov/data-and-tools-download.html</a> | 1    | 13.43041667 | 10      | 50.9   | 10.13645147 | 6.5     | 17.65   |
| Svi_Ep_Noveh    | Percentage of households with no vehicle available estimate                                                            | 2016 SVI | Census          | Public          | <a href="https://svi.cdc.gov/data-and-tools-download.html">https://svi.cdc.gov/data-and-tools-download.html</a> | 0    | 10.36291667 | 7       | 51.8   | 9.402122959 | 3.9     | 14.2    |
| Svi_Ep_Pci      | Per capita income estimate, 2012- 2016 ACS                                                                             | 2016 SVI | Census          | Public          | <a href="https://svi.cdc.gov/data-and-tools-download.html">https://svi.cdc.gov/data-and-tools-download.html</a> | 5355 | 31994.87917 | 31313.5 | 90921  | 12314.5096  | 23242.5 | 39219   |
| Svi_Ep_Pov      | Percentage of persons below poverty estimate                                                                           | 2016 SVI | Census          | Public          | <a href="https://svi.cdc.gov/data-and-tools-download.html">https://svi.cdc.gov/data-and-tools-download.html</a> | 0.7  | 14.555      | 10.5    | 56.4   | 11.57415133 | 5.5     | 20.7    |
| Svi_Ep_Sngpnt   | Percentage of single parent households with children under 18 estimate, 2012- 2016 ACS                                 | 2016 SVI | Census          | Public          | <a href="https://svi.cdc.gov/data-and-tools-download.html">https://svi.cdc.gov/data-and-tools-download.html</a> | 0    | 9.983333333 | 7.5     | 36.5   | 7.39542246  | 4.8     | 13.6    |
| Svi_Ep_Unemp    | Percentage of civilian (age 16+) unemployed estimate                                                                   | 2016 SVI | Census          | Public          | <a href="https://svi.cdc.gov/data-and-tools-download.html">https://svi.cdc.gov/data-and-tools-download.html</a> | 0.4  | 7.874583333 | 7.1     | 22.4   | 4.145842783 | 4.9     | 9.85    |
| Svi_Ep_Uninsur  | Adjunct variable - Percentage uninsured in the total civilian noninstitutionalized population estimate, 2012- 2016 ACS | 2016 SVI | Census          | Public          | <a href="https://svi.cdc.gov/data-and-tools-download.html">https://svi.cdc.gov/data-and-tools-download.html</a> | 0    | 8.224166667 | 6.35    | 35     | 5.939034702 | 4.1     | 11.55   |
| Svi_Epl_Age17   | Percentile percentage of persons aged 17 and younger estimate                                                          | 2016 SVI | Census          | Public          | <a href="https://svi.cdc.gov/data-and-tools-download.html">https://svi.cdc.gov/data-and-tools-download.html</a> | 0    | 0.5         | 0.5     | 1      | 0.290484867 | 0.24895 | 0.75105 |
| Svi_Epl_Age65   | Percentile percentage of persons aged 65 and older estimate                                                            | 2016 SVI | Census          | Public          | <a href="https://svi.cdc.gov/data-and-tools-download.html">https://svi.cdc.gov/data-and-tools-download.html</a> | 0    | 0.497681667 | 0.4979  | 1      | 0.290547356 | 0.24685 | 0.75105 |
| Svi_Epl_Crowd   | Percentile percentage households with more people than rooms estimate                                                  | 2016 SVI | Census          | Public          | <a href="https://svi.cdc.gov/data-and-tools-download.html">https://svi.cdc.gov/data-and-tools-download.html</a> | 0    | 0.461453333 | 0.5     | 1      | 0.338256053 | 0       | 0.75105 |
| Svi_Epl_Disabl  | Percentile percentage of civilian noninstitutionalized population with a disability estimate                           | 2016 SVI | Census          | Public          | <a href="https://svi.cdc.gov/data-and-tools-download.html">https://svi.cdc.gov/data-and-tools-download.html</a> | 0    | 0.495188333 | 0.5     | 1      | 0.290410718 | 0.2385  | 0.7406  |
| Svi_Epl_Groupq  | Percentile percentage of persons in institutionalized group quarters estimate                                          | 2016 SVI | Census          | Public          | <a href="https://svi.cdc.gov/data-and-tools-download.html">https://svi.cdc.gov/data-and-tools-download.html</a> | 0    | 0.48640125  | 0.5     | 1      | 0.310397839 | 0.24895 | 0.75105 |
| Svi_Epl_Limeng  | Percentile percentage of persons (age 5+) who speak English "less than well" estimate                                  | 2016 SVI | Census          | Public          | <a href="https://svi.cdc.gov/data-and-tools-download.html">https://svi.cdc.gov/data-and-tools-download.html</a> | 0    | 0.495187917 | 0.5     | 1      | 0.298116863 | 0.24895 | 0.75105 |
| Svi_Epl_Minrty  | Percentile percentage minority (all persons except white, non-Hispanic) estimate                                       | 2016 SVI | Census          | Public          | <a href="https://svi.cdc.gov/data-and-tools-download.html">https://svi.cdc.gov/data-and-tools-download.html</a> | 0    | 0.5         | 0.5     | 1      | 0.290484867 | 0.24895 | 0.75105 |
| Svi_Epl_Mobile  | Percentile percentage mobile homes estimate                                                                            | 2016 SVI | Census          | Public          | <a href="https://svi.cdc.gov/data-and-tools-download.html">https://svi.cdc.gov/data-and-tools-download.html</a> | 0    | 0.23373625  | 0       | 1      | 0.386603685 | 0       | 0.749   |
| Svi_Epl_Munit   | Percentile percentage housing in structures with 10 or more units estimate                                             | 2016 SVI | Census          | Public          | <a href="https://svi.cdc.gov/data-and-tools-download.html">https://svi.cdc.gov/data-and-tools-download.html</a> | 0    | 0.493409583 | 0.5     | 1      | 0.300746013 | 0.24895 | 0.75105 |
| Svi_Epl_Noahsdp | Percentile Percentage of persons with no high school diploma (age 25+) estimate                                        | 2016 SVI | Census          | Public          | <a href="https://svi.cdc.gov/data-and-tools-download.html">https://svi.cdc.gov/data-and-tools-download.html</a> | 0    | 0.498027083 | 0.5     | 1      | 0.291119708 | 0.2469  | 0.75105 |
| Svi_Epl_Noveh   | Percentile percentage households with no vehicle available estimate                                                    | 2016 SVI | Census          | Public          | <a href="https://svi.cdc.gov/data-and-tools-download.html">https://svi.cdc.gov/data-and-tools-download.html</a> | 0    | 0.49734625  | 0.4979  | 1      | 0.291798668 | 0.2427  | 0.74895 |
| Svi_Epl_Pci     | Percentile per capita income estimate                                                                                  | 2016 SVI | Census          | Public          | <a href="https://svi.cdc.gov/data-and-tools-download.html">https://svi.cdc.gov/data-and-tools-download.html</a> | 0    | 0.5000175   | 0.5     | 1      | 0.290509668 | 0.24895 | 0.75105 |
| Svi_Epl_Pov     | Percentile Percentage of persons below poverty estimate                                                                | 2016 SVI | Census          | Public          | <a href="https://svi.cdc.gov/data-and-tools-download.html">https://svi.cdc.gov/data-and-tools-download.html</a> | 0    | 0.4982775   | 0.4937  | 1      | 0.291308831 | 0.2469  | 0.749   |
| Svi_Epl_Sngpnt  | Percentile percentage of single parent households with children under 18 estimate                                      | 2016 SVI | Census          | Public          | <a href="https://svi.cdc.gov/data-and-tools-download.html">https://svi.cdc.gov/data-and-tools-download.html</a> | 0    | 0.5         | 0.5     | 1      | 0.290484867 | 0.24895 | 0.75105 |
| Svi_Epl_Unemp   | Percentile Percentage of civilian (age 16+) unemployed estimate                                                        | 2016 SVI | Census          | Public          | <a href="https://svi.cdc.gov/data-and-tools-download.html">https://svi.cdc.gov/data-and-tools-download.html</a> | 0    | 0.496130833 | 0.4937  | 0.9958 | 0.291073113 | 0.2385  | 0.75105 |
| Svi_F_Age17     | Flag - the percentage of persons aged 17 and younger is in the 90th percentile (1 = yes, 0 = no)                       | 2016 SVI | Census          | Public          | <a href="https://svi.cdc.gov/data-and-tools-download.html">https://svi.cdc.gov/data-and-tools-download.html</a> | 0    | 0.1         | 0       | 1      | 0.30062696  | 0       | 0       |
| Svi_F_Age65     | Flag - the percentage of persons aged 65 and older is in the 90th percentile (1 = yes, 0 = no)                         | 2016 SVI | Census          | Public          | <a href="https://svi.cdc.gov/data-and-tools-download.html">https://svi.cdc.gov/data-and-tools-download.html</a> | 0    | 0.1         | 0       | 1      | 0.30062696  | 0       | 0       |
| Svi_F_Crowd     | Flag - the percentage of crowded households is in the 90th percentile (1 = yes, 0 = no)                                | 2016 SVI | Census          | Public          | <a href="https://svi.cdc.gov/data-and-tools-download.html">https://svi.cdc.gov/data-and-tools-download.html</a> | 0    | 0.1         | 0       | 1      | 0.30062696  | 0       | 0       |
| Svi_F_Disabl    | Flag - the percentage of persons with a disability is in the 90th percentile (1 = yes, 0 = no)                         | 2016 SVI | Census          | Public          | <a href="https://svi.cdc.gov/data-and-tools-download.html">https://svi.cdc.gov/data-and-tools-download.html</a> | 0    | 0.095833333 | 0       | 1      | 0.294977719 | 0       | 0       |
| Svi_F_Groupq    | Flag - the percentage of persons in institutionalized group quarters is in the 90th percentile (1 = yes, 0 = no)       | 2016 SVI | Census          | Public          | <a href="https://svi.cdc.gov/data-and-tools-download.html">https://svi.cdc.gov/data-and-tools-download.html</a> | 0    | 0.1         | 0       | 1      | 0.30062696  | 0       | 0       |
| Svi_F_Limeng    | Flag - the percentage those with limited English is in the 90th percentile (1 = yes, 0 = no)                           | 2016 SVI | Census          | Public          | <a href="https://svi.cdc.gov/data-and-tools-download.html">https://svi.cdc.gov/data-and-tools-download.html</a> | 0    | 0.1         | 0       | 1      | 0.30062696  | 0       | 0       |
| Svi_F_Minrty    | Flag - the percentage of minority is in the 90th percentile (1 = yes, 0 = no)                                          | 2016 SVI | Census          | Public          | <a href="https://svi.cdc.gov/data-and-tools-download.html">https://svi.cdc.gov/data-and-tools-download.html</a> | 0    | 0.1         | 0       | 1      | 0.30062696  | 0       | 0       |
| Svi_F_Mobile    | Flag - the percentage of mobile homes is in the 90th percentile (1 = yes, 0 = no)                                      | 2016 SVI | Census          | Public          | <a href="https://svi.cdc.gov/data-and-tools-download.html">https://svi.cdc.gov/data-and-tools-download.html</a> | 0    | 0.1         | 0       | 1      | 0.30062696  | 0       | 0       |
| Svi_F_Munit     | Flag - the percentage of households in multi-unit housing is in the 90th percentile (1 = yes, 0 = no)                  | 2016 SVI | Census          | Public          | <a href="https://svi.cdc.gov/data-and-tools-download.html">https://svi.cdc.gov/data-and-tools-download.html</a> | 0    | 0.1         | 0       | 1      | 0.30062696  | 0       | 0       |

**Supplemental File S2-VILLAGE Manuscript Table - v.2021.04.21**

| Variable      | Description                                                                                                    | Dataset  | Geographic Unit | Level of Access | Location                                                                                                        | Min         | Mean        | Median      | Max         | StdDev      | Q1          | Q3          |
|---------------|----------------------------------------------------------------------------------------------------------------|----------|-----------------|-----------------|-----------------------------------------------------------------------------------------------------------------|-------------|-------------|-------------|-------------|-------------|-------------|-------------|
| Svi_F_Nohsdp  | Flag - the percentage of persons with no high school diploma is in the 90th percentile (1 = yes, 0 = no)       | 2016 SVI | Census          | Public          | <a href="https://svi.cdc.gov/data-and-tools-download.html">https://svi.cdc.gov/data-and-tools-download.html</a> | 0           | 0.1         | 0           | 1           | 0.30062696  | 0           | 0           |
| Svi_F_Noveh   | Flag - the percentage of households with no vehicles is in the 90th percentile (1 = yes, 0 = no)               | 2016 SVI | Census          | Public          | <a href="https://svi.cdc.gov/data-and-tools-download.html">https://svi.cdc.gov/data-and-tools-download.html</a> | 0           | 0.1         | 0           | 1           | 0.30062696  | 0           | 0           |
| Svi_F_Pci     | Flag - per capita income is in the 90th percentile (1 = yes, 0 = no)                                           | 2016 SVI | Census          | Public          | <a href="https://svi.cdc.gov/data-and-tools-download.html">https://svi.cdc.gov/data-and-tools-download.html</a> | 0           | 0.1         | 0           | 1           | 0.30062696  | 0           | 0           |
| Svi_F_Pov     | Flag - the percentage of persons in poverty is in the 90th percentile (1 = yes, 0 = no)                        | 2016 SVI | Census          | Public          | <a href="https://svi.cdc.gov/data-and-tools-download.html">https://svi.cdc.gov/data-and-tools-download.html</a> | 0           | 0.1         | 0           | 1           | 0.30062696  | 0           | 0           |
| Svi_F_Sngpnt  | Flag - the percentage of single parent households is in the 90th percentile (1 = yes, 0 = no)                  | 2016 SVI | Census          | Public          | <a href="https://svi.cdc.gov/data-and-tools-download.html">https://svi.cdc.gov/data-and-tools-download.html</a> | 0           | 0.1         | 0           | 1           | 0.30062696  | 0           | 0           |
| Svi_F_Theme1  | Sum of flags for Socioeconomic Status theme                                                                    | 2016 SVI | Census          | Public          | <a href="https://svi.cdc.gov/data-and-tools-download.html">https://svi.cdc.gov/data-and-tools-download.html</a> | 0           | 0.4         | 0           | 4           | 0.927497195 | 0           | 0           |
| Svi_F_Theme2  | Sum of flags for Household Composition theme                                                                   | 2016 SVI | Census          | Public          | <a href="https://svi.cdc.gov/data-and-tools-download.html">https://svi.cdc.gov/data-and-tools-download.html</a> | 0           | 0.395833333 | 0           | 3           | 0.682708835 | 0           | 1           |
| Svi_F_Theme3  | Sum of flags for Minority Status/Language theme                                                                | 2016 SVI | Census          | Public          | <a href="https://svi.cdc.gov/data-and-tools-download.html">https://svi.cdc.gov/data-and-tools-download.html</a> | 0           | 0.2         | 0           | 2           | 0.565389487 | 0           | 0           |
| Svi_F_Theme4  | Sum of flags for Housing/Transportation theme                                                                  | 2016 SVI | Census          | Public          | <a href="https://svi.cdc.gov/data-and-tools-download.html">https://svi.cdc.gov/data-and-tools-download.html</a> | 0           | 0.5         | 0           | 4           | 0.77080624  | 0           | 1           |
| Svi_F_Total   | Sum of flags for the four themes                                                                               | 2016 SVI | Census          | Public          | <a href="https://svi.cdc.gov/data-and-tools-download.html">https://svi.cdc.gov/data-and-tools-download.html</a> | 0           | 1.495833333 | 1           | 10          | 2.288771786 | 0           | 2           |
| Svi_F_Unemp   | Flag - the percentage of civilian unemployed is in the 90th percentile (1 = yes, 0 = no)                       | 2016 SVI | Census          | Public          | <a href="https://svi.cdc.gov/data-and-tools-download.html">https://svi.cdc.gov/data-and-tools-download.html</a> | 0           | 0.1         | 0           | 1           | 0.30062696  | 0           | 0           |
| Svi_Fips      | Tract-level FIPS code                                                                                          | 2016 SVI | Census          | Public          | <a href="https://svi.cdc.gov/data-and-tools-download.html">https://svi.cdc.gov/data-and-tools-download.html</a> | 44001030100 | 44006162244 | 44007010751 | 44009051504 | 2073252.52  | 44005040750 | 44007015150 |
| Svi_M_Age17   | Persons aged 17 and younger estimate MOE, 2012-2016 ACS                                                        | 2016 SVI | Census          | Public          | <a href="https://svi.cdc.gov/data-and-tools-download.html">https://svi.cdc.gov/data-and-tools-download.html</a> | 18          | 176.7041667 | 159.5       | 580         | 88.57221709 | 114         | 225         |
| Svi_M_Age65   | Persons aged 65 and older estimate MOE, 2012-2016 ACS                                                          | 2016 SVI | Census          | Public          | <a href="https://svi.cdc.gov/data-and-tools-download.html">https://svi.cdc.gov/data-and-tools-download.html</a> | 14          | 118.6791667 | 111         | 347         | 48.37459722 | 84.5        | 152         |
| Svi_M_Crowd   | At household level (occupied housing units), more people than rooms estimate MOE, 2012-2016 ACS                | 2016 SVI | Census          | Public          | <a href="https://svi.cdc.gov/data-and-tools-download.html">https://svi.cdc.gov/data-and-tools-download.html</a> | 12.6        | 34.69291667 | 25.05       | 114.7       | 21.66891976 | 17          | 45.75       |
| Svi_M_Disabl  | Civilian noninstitutionalized population with a disability estimate MOE, 2012-2016 ACS                         | 2016 SVI | Census          | Public          | <a href="https://svi.cdc.gov/data-and-tools-download.html">https://svi.cdc.gov/data-and-tools-download.html</a> | 41          | 159.575     | 146         | 382         | 64.78547315 | 112         | 200.5       |
| Svi_M_Groupqq | Persons in institutionalized group quarters estimate MOE, 2012-2016 ACS                                        | 2016 SVI | Census          | Public          | <a href="https://svi.cdc.gov/data-and-tools-download.html">https://svi.cdc.gov/data-and-tools-download.html</a> | 3           | 52.95833333 | 17          | 435         | 67.58282021 | 10          | 86          |
| Svi_M_Hh      | Households estimate MOE, 2012-2016 ACS                                                                         | 2016 SVI | Census          | Public          | <a href="https://svi.cdc.gov/data-and-tools-download.html">https://svi.cdc.gov/data-and-tools-download.html</a> | 38          | 111.3041667 | 108         | 244         | 36.4859574  | 85.5        | 132         |
| Svi_M_Hu      | Housing units estimate MOE, 2012-2016 ACS                                                                      | 2016 SVI | Census          | Public          | <a href="https://svi.cdc.gov/data-and-tools-download.html">https://svi.cdc.gov/data-and-tools-download.html</a> | 18          | 80.08333333 | 71          | 197         | 34.1004137  | 56          | 97.5        |
| Svi_M_Limeng  | Persons (age 5+) who speak English "less than well" estimate MOE, 2012-2016 ACS                                | 2016 SVI | Census          | Public          | <a href="https://svi.cdc.gov/data-and-tools-download.html">https://svi.cdc.gov/data-and-tools-download.html</a> | 45.8        | 106.7820833 | 76.1        | 561.8       | 80.94075092 | 55.9        | 122.25      |
| Svi_M_Minrty  | Minority (all persons except white, nonHispanic) estimate MOE, 2012-2016 ACS                                   | 2016 SVI | Census          | Public          | <a href="https://svi.cdc.gov/data-and-tools-download.html">https://svi.cdc.gov/data-and-tools-download.html</a> | 87.1        | 472.49875   | 470.1       | 1020.1      | 161.1520908 | 359.85      | 561.45      |
| Svi_M_Mobile  | Mobile homes estimate MOE, 2012-2016 ACS                                                                       | 2016 SVI | Census          | Public          | <a href="https://svi.cdc.gov/data-and-tools-download.html">https://svi.cdc.gov/data-and-tools-download.html</a> | 6           | 22.05       | 12          | 157         | 20.67231893 | 12          | 17          |
| Svi_M_Munit   | Housing in structures with 10 or more units estimate MOE, 2012-2016 ACS                                        | 2016 SVI | Census          | Public          | <a href="https://svi.cdc.gov/data-and-tools-download.html">https://svi.cdc.gov/data-and-tools-download.html</a> | 14.4        | 76.55166667 | 67.9        | 218         | 50.89564676 | 34.7        | 102.05      |
| Svi_M_Nohsdp  | Persons (age 25+) with no high school diploma estimate MOE, 2012-2016 ACS                                      | 2016 SVI | Census          | Public          | <a href="https://svi.cdc.gov/data-and-tools-download.html">https://svi.cdc.gov/data-and-tools-download.html</a> | 5           | 134.25      | 118.5       | 523         | 74.04948588 | 89          | 168         |
| Svi_M_Noveh   | Households with no vehicle available estimate MOE, 2012-2016 ACS                                               | 2016 SVI | Census          | Public          | <a href="https://svi.cdc.gov/data-and-tools-download.html">https://svi.cdc.gov/data-and-tools-download.html</a> | 6           | 73.325      | 70          | 199         | 41.16975014 | 42          | 98          |
| Svi_M_Pci     | Per capita income estimate MOE, 2012-2016 ACS                                                                  | 2016 SVI | Census          | Public          | <a href="https://svi.cdc.gov/data-and-tools-download.html">https://svi.cdc.gov/data-and-tools-download.html</a> | 744         | 4395.9375   | 3691        | 14037       | 2422.56909  | 2767        | 5168        |
| Svi_M_Pov     | Persons below poverty estimate MOE, 2012-2016 ACS                                                              | 2016 SVI | Census          | Public          | <a href="https://svi.cdc.gov/data-and-tools-download.html">https://svi.cdc.gov/data-and-tools-download.html</a> | 20          | 242.0208333 | 207         | 930         | 153.6365174 | 128.5       | 320.5       |
| Svi_M_Sngpnt  | Single parent household with children under 18 estimate MOE, 2012-2016 ACS                                     | 2016 SVI | Census          | Public          | <a href="https://svi.cdc.gov/data-and-tools-download.html">https://svi.cdc.gov/data-and-tools-download.html</a> | 14.4        | 81.64208333 | 71.15       | 231.9       | 42.81504863 | 52.65       | 101.5       |
| Svi_M_Totpop  | Population estimate MOE, 2012-2016 ACS                                                                         | 2016 SVI | Census          | Public          | <a href="https://svi.cdc.gov/data-and-tools-download.html">https://svi.cdc.gov/data-and-tools-download.html</a> | 15          | 345.275     | 327.5       | 936         | 147.3736868 | 244         | 426.5       |
| Svi_M_Unemp   | Civilian (age 16+) unemployed estimate MOE, 2012-2016 ACS                                                      | 2016 SVI | Census          | Public          | <a href="https://svi.cdc.gov/data-and-tools-download.html">https://svi.cdc.gov/data-and-tools-download.html</a> | 8           | 92.07083333 | 83          | 328         | 47.80328396 | 60          | 116         |
| Svi_M_Uninsur | Adjunct variable - Uninsured in the total civilian noninstitutionalized population estimate MOE, 2012-2016 ACS | 2016 SVI | Census          | Public          | <a href="https://svi.cdc.gov/data-and-tools-download.html">https://svi.cdc.gov/data-and-tools-download.html</a> | 12          | 162.1083333 | 136.5       | 605         | 100.8687615 | 92          | 204         |
| Svi_Mp_Age17  | Percentage of persons aged 17 and younger estimate MOE, 2012-2016 ACS                                          | 2016 SVI | Census          | Public          | <a href="https://svi.cdc.gov/data-and-tools-download.html">https://svi.cdc.gov/data-and-tools-download.html</a> | 0.6         | 3.82875     | 3.6         | 10.6        | 1.724293106 | 2.45        | 4.95        |
| Svi_Mp_Age65  | Percentage of persons aged 65 and older estimate MOE, 2012-2016 ACS                                            | 2016 SVI | Census          | Public          | <a href="https://svi.cdc.gov/data-and-tools-download.html">https://svi.cdc.gov/data-and-tools-download.html</a> | 0.4         | 2.869166667 | 2.7         | 7           | 1.001655185 | 2.3         | 3.35        |
| Svi_Mp_Crowd  | Percentage of occupied housing units with more people than rooms estimate MOE                                  | 2016 SVI | Census          | Public          | <a href="https://svi.cdc.gov/data-and-tools-download.html">https://svi.cdc.gov/data-and-tools-download.html</a> | 0.7         | 2.208333333 | 1.6         | 11.1        | 1.397851509 | 1.2         | 3.1         |

Supplemental File S2-VILLAGE Manuscript Table - v.2021.04.21

| Variable                       | Description                                                                                                               | Dataset  | Geographic Unit | Level of Access | Location                                                                                                        | Min         | Mean        | Median      | Max         | StdDev      | Q1          | Q3          |
|--------------------------------|---------------------------------------------------------------------------------------------------------------------------|----------|-----------------|-----------------|-----------------------------------------------------------------------------------------------------------------|-------------|-------------|-------------|-------------|-------------|-------------|-------------|
| Svi_Mp_Disabl                  | Percentage of civilian noninstitutionalized population with a disability estimate MOE, 2012-2016 ACS                      | 2016 SVI | Census          | Public          | <a href="https://svi.cdc.gov/data-and-tools-download.html">https://svi.cdc.gov/data-and-tools-download.html</a> | 1.2         | 3.762916667 | 3.6         | 10.1        | 1.155847347 | 3.1         | 4.45        |
| Svi_Mp_Groupq                  | Percentage of persons in institutionalized group quarters estimate MOE, 2012- 2016 ACS                                    | 2016 SVI | Census          | Public          | <a href="https://svi.cdc.gov/data-and-tools-download.html">https://svi.cdc.gov/data-and-tools-download.html</a> | 0.1         | 1.19375     | 0.5         | 10.2        | 1.548978102 | 0.2         | 1.8         |
| Svi_Mp_Limeng                  | Percentage of persons (age 5+) who speak English "less than well" estimate MOE, 2012-2016 ACS                             | 2016 SVI | Census          | Public          | <a href="https://svi.cdc.gov/data-and-tools-download.html">https://svi.cdc.gov/data-and-tools-download.html</a> | 0.9         | 2.675       | 2.1         | 12.3        | 1.734163249 | 1.4         | 3.4         |
| Svi_Mp_Minrty                  | Percentage minority (all persons except white, nonHispanic) estimate MOE, 2012-2016 ACS                                   | 2016 SVI | Census          | Public          | <a href="https://svi.cdc.gov/data-and-tools-download.html">https://svi.cdc.gov/data-and-tools-download.html</a> | 2.5         | 10.64625    | 10.2        | 23.5        | 3.411080042 | 8.4         | 12.05       |
| Svi_Mp_Mobile                  | Percentage of mobile homes estimate MOE                                                                                   | 2016 SVI | Census          | Public          | <a href="https://svi.cdc.gov/data-and-tools-download.html">https://svi.cdc.gov/data-and-tools-download.html</a> | 0.3         | 2.204583333 | 1.9         | 13.4        | 1.408528949 | 1.5         | 2.6         |
| Svi_Mp_Munit                   | Percentage of housing in structures with 10 or more units estimate MOE                                                    | 2016 SVI | Census          | Public          | <a href="https://svi.cdc.gov/data-and-tools-download.html">https://svi.cdc.gov/data-and-tools-download.html</a> | 0.4         | 3.974166667 | 4           | 13.3        | 2.215804616 | 2.2         | 5.4         |
| Svi_Mp_Nohsdp                  | Percentage of persons with no high school diploma (25+) estimate MOE                                                      | 2016 SVI | Census          | Public          | <a href="https://svi.cdc.gov/data-and-tools-download.html">https://svi.cdc.gov/data-and-tools-download.html</a> | 0.8         | 4.314166667 | 3.9         | 10.7        | 1.890354103 | 2.8         | 5.5         |
| Svi_Mp_Noveh                   | Percentage of households with no vehicle available estimate MOE                                                           | 2016 SVI | Census          | Public          | <a href="https://svi.cdc.gov/data-and-tools-download.html">https://svi.cdc.gov/data-and-tools-download.html</a> | 0.7         | 4.40875     | 4.05        | 16.5        | 2.285639748 | 2.7         | 5.9         |
| Svi_Mp_Pci                     | Per capita income estimate MOE, 2012-2016 ACS                                                                             | 2016 SVI | Census          | Public          | <a href="https://svi.cdc.gov/data-and-tools-download.html">https://svi.cdc.gov/data-and-tools-download.html</a> | 744         | 4395.9375   | 3691        | 14037       | 2422.56909  | 2767        | 5168        |
| Svi_Mp_Pov                     | Percentage of persons below poverty estimate MOE                                                                          | 2016 SVI | Census          | Public          | <a href="https://svi.cdc.gov/data-and-tools-download.html">https://svi.cdc.gov/data-and-tools-download.html</a> | 0.5         | 5.701666667 | 5.45        | 19          | 3.148951697 | 3.1         | 7.65        |
| Svi_Mp_Sngpnt                  | Percentage of single parent households with children under 18 estimate MOE, 2012-2016 ACS                                 | 2016 SVI | Census          | Public          | <a href="https://svi.cdc.gov/data-and-tools-download.html">https://svi.cdc.gov/data-and-tools-download.html</a> | 1.2         | 4.8925      | 4.4         | 23.9        | 2.358024224 | 3.3         | 6.05        |
| Svi_Mp_Unemp                   | Percentage of civilian (age 16+) unemployed estimate MOE                                                                  | 2016 SVI | Census          | Public          | <a href="https://svi.cdc.gov/data-and-tools-download.html">https://svi.cdc.gov/data-and-tools-download.html</a> | 0.6         | 3.96        | 3.7         | 14.1        | 1.718221324 | 2.8         | 4.8         |
| Svi_Mp_Uninsur                 | Adjunct variable - Percentage uninsured in the total civilian noninstitutionalized population estimate MOE, 2012-2016 ACS | 2016 SVI | Census          | Public          | <a href="https://svi.cdc.gov/data-and-tools-download.html">https://svi.cdc.gov/data-and-tools-download.html</a> | 0.8         | 3.765833333 | 3.4         | 20.8        | 2.150196871 | 2.3         | 4.8         |
| Svi_Rpl_Theme1                 | Percentile ranking for Socioeconomic theme summary                                                                        | 2016 SVI | Census          | Public          | <a href="https://svi.cdc.gov/data-and-tools-download.html">https://svi.cdc.gov/data-and-tools-download.html</a> | 0           | 0.49980875  | 0.5         | 1           | 0.29037647  | 0.24895     | 0.75105     |
| Svi_Rpl_Theme2                 | Percentile ranking for Household Composition theme summary                                                                | 2016 SVI | Census          | Public          | <a href="https://svi.cdc.gov/data-and-tools-download.html">https://svi.cdc.gov/data-and-tools-download.html</a> | 0           | 0.49980875  | 0.5         | 1           | 0.290422348 | 0.24895     | 0.75105     |
| Svi_Rpl_Theme3                 | Percentile ranking for Minority Status/Language theme                                                                     | 2016 SVI | Census          | Public          | <a href="https://svi.cdc.gov/data-and-tools-download.html">https://svi.cdc.gov/data-and-tools-download.html</a> | 0           | 0.499493333 | 0.5         | 1           | 0.290417455 | 0.24895     | 0.75105     |
| Svi_Rpl_Theme4                 | Percentile ranking for Housing/Transportation theme                                                                       | 2016 SVI | Census          | Public          | <a href="https://svi.cdc.gov/data-and-tools-download.html">https://svi.cdc.gov/data-and-tools-download.html</a> | 0           | 0.499790417 | 0.5         | 1           | 0.290416632 | 0.24895     | 0.75105     |
| Svi_Rpl_Themes                 | Overall percentile ranking                                                                                                | 2016 SVI | Census          | Public          | <a href="https://svi.cdc.gov/data-and-tools-download.html">https://svi.cdc.gov/data-and-tools-download.html</a> | 0           | 0.4999825   | 0.5         | 1           | 0.290475501 | 0.24895     | 0.75105     |
| Svi_Spl_Theme1                 | Sum of series for Socioeconomic theme                                                                                     | 2016 SVI | Census          | Public          | <a href="https://svi.cdc.gov/data-and-tools-download.html">https://svi.cdc.gov/data-and-tools-download.html</a> | 0.1841      | 1.992449583 | 1.87655     | 3.8703      | 0.999971142 | 1.1548      | 2.7887      |
| Svi_Spl_Theme2                 | Sum of series for Household Composition theme                                                                             | 2016 SVI | Census          | Public          | <a href="https://svi.cdc.gov/data-and-tools-download.html">https://svi.cdc.gov/data-and-tools-download.html</a> | 0.0335      | 1.99286875  | 1.9916      | 3.1464      | 0.571394233 | 1.659       | 2.3912      |
| Svi_Spl_Theme3                 | Sum of series for Minority Status/Language theme                                                                          | 2016 SVI | Census          | Public          | <a href="https://svi.cdc.gov/data-and-tools-download.html">https://svi.cdc.gov/data-and-tools-download.html</a> | 0.0084      | 0.995184583 | 0.92885     | 1.9916      | 0.559265474 | 0.5335      | 1.4728      |
| Svi_Spl_Theme4                 | Sum of series for Housing/Transportation theme                                                                            | 2016 SVI | Census          | Public          | <a href="https://svi.cdc.gov/data-and-tools-download.html">https://svi.cdc.gov/data-and-tools-download.html</a> | 0.1339      | 2.172345417 | 2.1569      | 3.9916      | 0.808176318 | 1.6569      | 2.7134      |
| Svi_Spl_Themes                 | Sum of series themes                                                                                                      | 2016 SVI | Census          | Public          | <a href="https://svi.cdc.gov/data-and-tools-download.html">https://svi.cdc.gov/data-and-tools-download.html</a> | 2.2594      | 7.152859583 | 6.81385     | 12.6527     | 2.306457813 | 5.5042      | 8.88495     |
| Total_Deaths                   | -                                                                                                                         | CME      | Point           | Private         | -                                                                                                               | 0           | 4.633333333 | 3.5         | 22          | 3.737032437 | 2           | 6           |
| Total_Population               | Total population of census tract                                                                                          | Census   | Census          | Public          | <a href="https://www.census.gov/data/data-tools.html">https://www.census.gov/data/data-tools.html</a>           | 885         | 4393.7125   | 4353.5      | 8561        | 1536.43083  | 3179        | 5513        |
| VAR1                           | -                                                                                                                         | -        | -               | -               | -                                                                                                               | 1           | 120.5       | 120.5       | 240         | 69.42621983 | 60.5        | 180.5       |
| VAR190                         | -                                                                                                                         | -        | -               | -               | -                                                                                                               | 0           | 0.022419165 | 0.013160294 | 0.177790904 | 0.027523041 | 0.004530968 | 0.030238487 |
| VAR92                          | -                                                                                                                         | -        | -               | -               | -                                                                                                               | 0.062857143 | 0.254577774 | 0.25284459  | 0.513443192 | 0.079728651 | 0.20661976  | 0.299319572 |
| Zip_Meth_Inj_2014to2016_weight | -                                                                                                                         | BHOLD    | Zip             | Public          | -                                                                                                               | 0           | 16.55       | 13          | 105         | 13.89611788 | 7           | 22          |
